# Supplementary material
Source: publisher site journal article supplement (https://static.cambridge.org/content/id/urn:cambridge.org:id:article:S0090599220000264/resource/name/S0090599220000264supp001.csv)
Supplement: Supplementary file 1 [file S0090599220000264supp001.csv]

v4018	v3040	v4022	v301	v307	v408	v409	v4010	v4012	v4016	v3025	v401	v5024	region	income	age	rus	urban	male	violence	av.salary0000
3	1	1	3	1	NA	3	1	6	1	4	1	1	1	4	3	0	1	1	0.77	0.93426
1	1	2	3	3	2	1	2	5	5	3	2	1	1	1	2	0	1	0	0.77	0.93426
1	2	5	3	1	1	2	9	1	1	1	3	1	1	3	2	0	1	0	0.77	0.93426
1	2	5	3	1	1	2	9	1	1	1	3	1	1	3	2	0	1	1	0.77	0.93426
1	3	6	5	1	9	9	9	6	5	1	5	2	1	1	3	1	1	1	0.77	0.93426
1	2	4	4	5	2	2	2	5	5	2	3	1	1	4	1	0	1	1	0.77	0.93426
1	2	5	4	5	2	3	3	2	5	3	3	1	1	3	1	0	1	1	0.77	0.93426
1	2	5	3	1	2	1	9	4	2	5	3	1	1	2	2	0	1	1	0.77	0.93426
2	3	5	4	5	1	1	4	4	1	4	2	1	1	2	2	0	1	1	0.77	0.93426
2	3	2	3	1	3	2	3	5	2	4	3	1	1	3	1	0	1	0	0.77	0.93426
1	1	2	3	2	1	2	1	1	1	5	3	2	1	4	2	1	1	1	0.77	0.93426
2	2	5	4	2	9	2	3	1	1	4	3	2	1	4	4	1	1	1	0.77	0.93426
1	3	5	3	3	2	2	4	3	2	5	4	1	1	4	2	0	1	0	0.77	0.93426
1	1	5	3	5	2	2	4	5	2	3	3	2	1	3	1	1	1	0	0.77	0.93426
1	2	1	3	1	2	2	4	2	1	1	3	1	1	3	2	0	1	1	0.77	0.93426
1	3	4	3	5	2	4	4	5	5	4	3	1	1	3	6	0	1	1	0.77	0.93426
1	3	3	3	1	3	2	3	3	5	4	3	2	1	4	6	1	1	1	0.77	0.93426
1	3	5	4	1	2	2	3	2	2	4	4	1	1	1	3	0	1	0	0.77	0.93426
1	1	5	3	1	4	9	2	6	5	1	1	2	1	1	3	1	1	0	0.77	0.93426
1	1	5	3	1	9	9	2	6	5	1	1	3	1	1	3	0	1	1	0.77	0.93426
1	1	5	5	1	4	9	2	6	5	1	1	2	1	1	4	1	1	1	0.77	0.93426
1	1	5	5	1	4	9	2	6	5	1	1	3	1	1	4	0	1	1	0.77	0.93426
3	1	6	4	4	9	9	9	6	5	5	1	1	1	1	5	0	1	0	0.77	0.93426
2	1	3	3	1	3	1	3	6	1	4	5	1	1	4	4	0	1	1	0.77	0.93426
1	1	3	4	1	3	1	3	6	1	4	2	1	1	4	2	0	1	0	0.77	0.93426
3	1	6	4	4	9	9	9	6	5	5	1	1	1	1	3	0	1	0	0.77	0.93426
2	1	3	3	1	3	1	3	6	1	4	5	2	1	4	3	1	1	1	0.77	0.93426
2	1	3	3	1	3	1	3	6	1	4	5	1	1	4	1	0	1	1	0.77	0.93426
1	2	4	4	5	2	2	2	5	5	2	3	1	1	4	2	0	1	0	0.77	0.93426
1	3	4	4	1	1	3	3	5	1	4	2	1	1	2	2	0	1	0	0.77	0.93426
1	2	5	3	2	9	9	9	6	5	5	2	1	1	1	1	0	1	0	0.77	0.93426
1	1	5	3	5	2	2	4	5	2	3	3	2	1	3	2	1	1	0	0.77	0.93426
1	3	5	4	2	1	1	2	6	5	3	3	2	1	2	2	1	1	0	0.77	0.93426
1	1	5	4	3	3	2	9	3	5	2	2	2	1	3	2	1	1	0	0.77	0.93426
1	1	5	4	1	2	2	3	5	1	4	1	2	1	4	5	1	1	0	0.77	0.93426
1	2	3	4	3	2	2	2	5	5	4	2	1	1	4	5	0	1	1	0.77	0.93426
1	1	5	4	1	3	3	3	5	1	5	1	4	1	4	1	0	1	0	0.77	0.93426
1	3	5	3	5	2	3	1	1	1	5	2	2	1	2	3	1	1	0	0.77	0.93426
1	1	2	3	1	3	9	3	6	1	2	3	1	1	4	1	0	1	1	0.77	0.93426
1	1	4	4	5	2	2	4	5	1	5	3	3	1	2	1	0	1	0	0.77	0.93426
1	2	5	4	3	3	3	4	2	1	4	2	2	1	4	3	1	1	1	0.77	0.93426
1	2	1	2	3	2	2	1	4	5	2	2	2	1	3	1	1	1	1	0.77	0.93426
1	1	4	4	1	4	3	1	1	1	3	2	2	1	1	5	1	1	1	0.77	0.93426
1	1	1	3	2	1	9	1	1	1	1	3	1	1	5	6	0	1	0	0.77	0.93426
1	3	3	3	5	3	3	9	6	1	5	3	3	1	4	2	0	1	0	0.77	0.93426
1	1	2	3	1	2	3	3	5	1	3	2	2	1	4	4	1	1	1	0.77	0.93426
1	1	1	4	1	1	2	1	1	1	1	4	1	1	1	6	0	1	0	0.77	0.93426
1	1	3	3	1	2	9	3	5	1	5	3	2	1	2	6	1	1	0	0.77	0.93426
1	1	1	4	1	1	3	1	1	1	1	4	1	1	2	5	0	1	0	0.77	0.93426
1	1	5	3	5	9	3	9	5	1	5	2	2	1	2	4	1	1	0	0.77	0.93426
1	1	5	3	5	9	9	4	5	1	5	3	1	1	4	3	0	1	0	0.77	0.93426
1	3	3	3	4	3	1	3	5	1	2	1	3	1	2	2	0	1	0	0.77	0.93426
1	1	6	3	1	2	9	4	6	1	2	5	2	1	1	6	1	1	1	0.77	0.93426
1	1	5	3	1	NA	2	9	5	1	5	2	3	1	2	5	0	1	1	0.77	0.93426
1	3	3	4	1	9	1	2	1	1	1	2	3	1	4	2	0	1	1	0.77	0.93426
1	3	4	4	5	1	4	4	1	5	4	3	1	1	3	5	0	1	0	0.77	0.93426
1	2	5	3	3	3	2	2	2	2	3	2	1	1	4	4	0	1	0	0.77	0.93426
1	2	4	3	1	3	4	9	3	2	3	4	1	1	3	3	0	1	1	0.77	0.93426
1	2	4	3	1	3	4	4	3	2	1	4	1	1	5	1	0	1	1	0.77	0.93426
1	3	6	5	5	1	4	4	2	5	5	2	5	1	2	3	0	1	0	0.77	0.93426
1	2	3	3	1	3	2	3	2	2	3	3	1	1	4	1	0	1	0	0.77	0.93426
1	2	1	3	3	3	2	2	1	1	4	3	1	1	2	4	0	1	1	0.77	0.93426
1	1	1	4	3	3	2	3	2	1	4	3	1	1	4	6	0	1	1	0.77	0.93426
1	3	4	4	5	3	1	4	2	4	5	3	5	1	2	3	0	1	1	0.77	0.93426
1	1	5	3	4	3	1	4	5	1	5	4	1	1	4	2	0	1	0	0.77	0.93426
1	1	5	2	3	3	2	4	3	2	3	4	1	1	4	3	0	1	1	0.77	0.93426
1	1	4	3	1	3	1	3	6	1	1	4	2	1	3	3	1	1	0	0.77	0.93426
1	1	4	2	4	3	1	3	5	1	1	3	2	1	3	3	1	1	0	0.77	0.93426
1	3	5	4	3	3	3	2	3	1	1	3	2	1	4	2	1	1	1	0.77	0.93426
1	2	2	3	3	2	3	3	5	2	4	2	1	1	1	2	0	1	0	0.77	0.93426
1	2	1	4	2	2	1	9	2	1	4	4	2	1	2	4	1	1	0	0.77	0.93426
2	3	2	3	4	2	2	2	4	5	5	4	2	1	2	4	1	1	0	0.77	0.93426
1	2	5	2	1	3	2	3	5	2	1	3	2	1	2	4	1	1	1	0.77	0.93426
1	1	5	3	5	2	1	9	5	1	3	5	2	1	4	2	1	1	0	0.77	0.93426
1	1	5	3	3	4	1	4	5	1	3	5	2	1	3	5	1	1	0	0.77	0.93426
1	1	5	4	1	1	2	1	5	1	5	4	2	1	3	4	1	1	0	0.77	0.93426
1	1	1	4	2	2	2	3	5	1	2	2	2	1	3	4	1	0	0	0.77	0.93426
1	2	5	4	4	3	3	4	3	1	4	2	2	1	3	3	1	1	0	0.77	0.93426
3	2	5	3	2	9	2	NA	6	1	3	3	1	1	NA	6	0	1	1	0.77	0.93426
1	3	1	4	1	3	2	1	4	1	5	2	2	1	2	3	1	1	1	0.77	0.93426
1	1	5	3	1	1	NA	1	1	5	5	2	2	1	2	6	1	1	0	0.77	0.93426
1	3	2	3	3	3	3	2	2	2	5	3	2	1	NA	6	1	1	0	0.77	0.93426
1	3	5	3	2	9	9	1	5	5	5	3	1	1	4	4	0	1	0	0.77	0.93426
1	1	5	4	1	4	1	2	1	1	1	2	2	1	3	4	1	1	0	0.77	0.93426
1	2	1	4	1	4	2	4	5	1	2	4	2	1	2	5	1	1	1	0.77	0.93426
1	2	5	3	1	2	3	4	1	1	4	3	1	1	3	2	0	1	1	0.77	0.93426
1	1	5	3	3	3	3	1	2	1	1	2	1	1	2	3	0	1	0	0.77	0.93426
1	3	5	3	3	3	2	1	3	2	2	2	1	1	4	3	0	1	1	0.77	0.93426
2	3	5	3	1	3	1	9	6	1	2	4	1	1	3	1	0	1	1	0.77	0.93426
1	2	5	4	2	3	2	4	5	1	4	1	1	1	2	2	0	1	0	0.77	0.93426
1	2	5	3	5	2	2	3	5	1	2	3	1	1	3	4	0	1	1	0.77	0.93426
1	2	3	4	5	9	2	9	2	1	5	3	3	1	3	1	0	1	0	0.77	0.93426
1	1	3	3	1	3	3	3	5	2	1	3	6	1	4	2	0	1	0	0.77	0.93426
1	1	1	4	1	2	1	1	6	1	4	1	1	1	3	4	0	1	0	0.77	0.93426
2	3	3	3	1	3	2	2	1	5	2	1	1	1	3	3	0	1	0	0.77	0.93426
1	1	5	1	2	9	3	9	6	2	5	3	1	1	1	6	0	1	0	0.77	0.93426
1	3	1	4	2	1	1	3	4	1	4	3	1	1	2	6	0	1	0	0.77	0.93426
1	2	3	3	5	9	2	3	2	1	2	2	1	1	3	2	0	1	0	0.77	0.93426
1	2	1	4	3	2	2	4	4	1	4	3	1	1	2	1	0	1	1	0.77	0.93426
2	2	1	4	3	3	1	2	4	1	2	3	1	1	4	4	0	1	1	0.77	0.93426
1	3	4	3	1	3	3	2	1	1	4	3	99	1	3	4	0	1	0	0.77	0.93426
2	1	2	4	1	1	2	3	2	1	2	4	1	1	3	1	0	1	0	0.77	0.93426
1	2	4	3	3	2	2	3	1	1	3	2	1	1	3	1	0	1	1	0.77	0.93426
2	2	1	2	2	1	1	3	1	1	2	2	1	1	3	1	0	1	1	0.77	0.93426
1	2	5	1	4	1	5	4	5	1	1	1	1	1	5	3	0	1	1	0.77	0.93426
1	2	6	3	2	3	1	3	4	1	4	4	1	1	4	2	0	1	1	0.77	0.93426
2	2	3	3	3	2	2	1	1	2	3	3	1	1	3	1	0	1	0	0.77	0.93426
1	3	4	4	2	2	2	1	1	2	3	4	1	1	1	6	0	1	0	0.77	0.93426
1	2	5	4	3	2	2	2	5	1	2	2	1	1	4	3	0	1	0	0.77	0.93426
1	3	2	3	3	2	1	4	2	2	3	3	1	1	2	1	0	1	0	0.77	0.93426
1	2	5	4	3	3	2	1	3	1	5	1	1	1	1	5	0	1	0	0.77	0.93426
1	2	5	3	2	2	2	2	5	1	4	3	1	1	1	4	0	1	0	0.77	0.93426
1	3	3	3	5	1	2	NA	1	1	3	3	1	1	NA	2	0	1	0	0.77	0.93426
1	3	5	3	3	2	2	3	2	1	3	3	1	1	3	1	0	1	0	0.77	0.93426
1	3	5	3	5	2	2	2	2	1	5	3	1	1	3	4	0	1	0	0.77	0.93426
1	1	2	3	1	9	3	9	3	3	4	1	1	1	NA	3	0	1	1	0.77	0.93426
2	2	4	2	2	2	3	1	2	1	1	2	1	1	3	3	0	1	0	0.77	0.93426
2	3	2	2	1	2	4	4	3	3	1	2	1	1	2	3	0	1	1	0.77	0.93426
3	3	1	3	2	9	9	9	6	5	2	3	1	1	4	3	0	1	1	0.77	0.93426
1	2	3	4	5	2	9	3	3	1	5	2	1	1	2	4	0	1	0	0.77	0.93426
1	2	5	3	3	2	1	9	4	2	5	3	1	1	2	1	0	1	0	0.77	0.93426
1	3	6	3	3	2	2	3	2	1	3	2	1	1	4	1	0	1	1	0.77	0.93426
1	1	5	4	3	9	2	4	5	5	5	2	99	1	NA	2	0	1	1	0.77	0.93426
1	3	1	3	5	4	3	4	5	2	2	4	1	1	3	1	0	1	1	0.77	0.93426
1	1	5	3	1	2	3	2	2	2	1	3	2	1	2	5	1	1	0	0.77	0.93426
1	3	5	3	3	2	3	2	5	1	2	3	2	1	2	5	1	1	0	0.77	0.93426
2	1	3	3	1	3	1	9	6	1	3	3	1	1	3	2	0	1	1	0.77	0.93426
1	1	6	3	2	2	9	9	5	2	3	5	1	1	3	4	0	0	1	0.77	0.93426
1	1	5	5	3	3	9	9	6	5	1	2	2	1	3	6	1	1	1	0.77	0.93426
NA	3	5	5	2	2	2	9	2	1	5	5	1	1	3	6	0	1	1	0.77	0.93426
3	3	5	4	3	4	9	3	6	5	5	5	1	1	3	6	0	1	0	0.77	0.93426
1	3	3	4	1	3	3	4	6	1	3	2	1	1	3	4	0	1	1	0.77	0.93426
1	1	5	3	3	2	2	2	5	1	3	5	1	1	4	2	0	1	0	0.77	0.93426
1	2	3	4	5	9	1	9	6	2	3	1	1	1	2	6	0	1	1	0.77	0.93426
1	3	5	4	2	9	2	9	5	1	3	5	1	1	3	4	0	1	0	0.77	0.93426
1	2	2	2	3	4	1	3	3	3	2	1	1	1	2	3	0	1	0	0.77	0.93426
1	3	5	3	2	2	2	2	2	1	3	5	1	1	3	2	0	1	0	0.77	0.93426
1	1	2	4	2	3	2	3	1	2	2	1	2	1	3	6	1	1	1	0.77	0.93426
1	3	5	3	2	2	2	9	5	1	3	4	1	1	4	6	0	1	0	0.77	0.93426
3	3	5	3	2	2	9	9	2	2	2	4	1	1	3	6	0	1	0	0.77	0.93426
1	1	4	1	1	4	3	2	4	3	4	3	1	1	3	6	0	1	0	0.77	0.93426
2	2	1	4	1	2	1	2	3	5	3	1	1	1	5	4	0	1	1	0.77	0.93426
2	3	5	3	2	9	2	9	4	2	3	5	1	1	3	3	0	1	1	0.77	0.93426
1	1	5	3	3	2	2	2	1	1	5	5	1	1	4	1	0	1	0	0.77	0.93426
1	1	1	4	3	3	1	1	4	4	5	1	1	1	2	6	0	1	0	0.77	0.93426
2	3	3	4	1	3	3	1	4	4	3	2	1	1	4	2	0	1	1	0.77	0.93426
1	3	5	3	5	9	9	9	6	2	3	5	1	1	3	2	0	1	1	0.77	0.93426
2	2	3	4	3	2	1	9	5	1	1	3	1	1	3	6	0	1	0	0.77	0.93426
1	3	5	3	5	9	1	2	6	5	5	3	1	1	NA	2	0	1	0	0.77	0.93426
2	3	1	3	3	4	3	1	3	3	5	3	1	1	2	5	0	1	0	0.77	0.93426
2	3	1	4	5	2	1	2	2	1	4	5	1	1	2	4	0	1	0	0.77	0.93426
1	1	1	4	5	3	3	1	2	3	4	3	1	1	1	6	0	1	0	0.77	0.93426
1	3	2	3	4	3	1	9	5	1	4	2	1	1	4	2	0	1	1	0.77	0.93426
1	1	3	3	1	3	2	3	3	1	3	3	2	1	3	3	1	1	0	0.77	0.93426
1	1	3	3	2	3	2	3	3	1	3	3	2	1	4	2	1	1	1	0.77	0.93426
1	2	3	4	1	4	3	2	5	1	3	4	2	1	3	1	1	1	1	0.77	0.93426
NA	NA	NA	NA	NA	NA	NA	NA	NA	NA	NA	NA	NA	1	4	NA	0	1	NA	0.77	0.93426
1	1	5	4	3	2	2	1	3	1	4	2	99	1	3	5	0	1	1	0.77	0.93426
1	1	3	4	1	4	2	2	5	5	5	1	1	1	NA	1	0	1	1	0.77	0.93426
1	3	1	3	5	2	3	2	2	5	5	2	1	1	4	1	0	1	0	0.77	0.93426
2	1	1	3	3	1	2	3	5	1	1	4	1	1	3	1	0	1	0	0.77	0.93426
1	1	1	2	3	2	1	1	2	1	4	3	2	1	2	6	1	1	0	0.77	0.93426
1	1	2	2	3	2	3	1	1	1	3	2	2	1	2	4	1	1	1	0.77	0.93426
1	2	1	3	1	1	2	2	2	2	4	2	1	1	4	4	0	1	0	0.77	0.93426
1	3	2	4	3	2	3	2	2	1	3	2	2	1	2	4	1	1	0	0.77	0.93426
1	3	5	2	5	3	1	9	5	2	1	3	2	1	3	6	1	1	0	0.77	0.93426
1	2	5	3	3	2	3	3	5	2	2	3	2	1	3	6	1	1	0	0.77	0.93426
1	1	2	4	3	9	9	4	6	5	3	3	1	1	NA	1	0	1	1	0.77	0.93426
1	2	5	3	3	2	2	3	2	2	3	2	1	1	4	1	0	1	1	0.77	0.93426
1	3	5	3	3	2	2	2	5	1	2	2	1	1	4	1	0	1	0	0.77	0.93426
1	1	5	4	3	9	2	4	5	5	5	2	99	1	NA	2	0	1	1	0.77	0.93426
2	3	5	2	5	3	1	3	5	5	2	2	1	1	4	1	0	1	0	0.77	0.93426
1	1	5	4	1	2	3	2	5	2	2	2	1	1	3	3	0	1	0	0.77	0.93426
2	2	6	4	3	9	2	4	4	1	4	5	1	1	3	2	0	1	1	0.77	0.93426
1	3	2	4	3	2	3	2	2	1	3	2	2	1	2	4	1	1	0	0.77	0.93426
1	2	5	3	5	3	3	4	5	2	3	2	1	1	4	5	0	1	0	0.77	0.93426
1	2	3	3	1	4	3	2	5	1	3	4	1	1	3	1	0	1	1	0.77	0.93426
1	3	5	1	3	4	1	9	6	1	3	2	2	1	3	2	1	1	0	0.77	0.93426
1	2	2	4	1	2	2	2	5	1	2	2	6	1	4	3	0	1	1	0.77	0.93426
1	3	3	3	3	2	9	3	3	1	1	5	6	1	3	2	0	1	0	0.77	0.93426
1	3	5	3	3	1	2	2	1	1	3	3	1	1	3	3	0	1	0	0.77	0.93426
1	1	5	2	5	2	2	3	2	1	5	3	1	1	3	4	0	1	0	0.77	0.93426
1	2	5	3	1	3	2	4	1	2	1	3	1	1	4	2	0	1	1	0.77	0.93426
1	3	5	3	5	2	3	9	2	1	5	3	2	1	3	6	1	1	0	0.77	0.93426
1	1	5	3	5	2	1	3	2	1	2	3	2	1	3	2	1	1	0	0.77	0.93426
1	3	5	3	3	3	3	4	4	2	5	5	1	1	3	6	0	1	1	0.77	0.93426
1	3	1	4	3	2	2	1	5	1	3	4	1	1	4	2	0	1	0	0.77	0.93426
1	2	3	2	4	1	3	3	1	1	2	2	1	1	3	2	0	1	1	0.77	0.93426
1	2	2	4	5	9	2	3	5	1	3	3	1	1	2	6	0	1	1	0.77	0.93426
1	3	4	4	1	1	3	4	1	1	3	3	1	1	1	2	0	0	1	0.77	0.93426
1	3	4	4	1	1	3	9	1	1	5	3	1	1	3	1	0	0	1	0.77	0.93426
1	2	4	3	4	3	9	3	3	5	4	4	1	1	4	2	0	0	0	0.77	0.93426
1	3	4	5	5	3	2	3	4	5	1	1	2	1	4	2	1	0	0	0.77	0.93426
1	3	5	3	5	3	2	4	6	5	3	4	1	1	4	2	0	0	1	0.77	0.93426
1	3	4	3	5	2	3	3	6	5	4	2	1	1	3	3	0	0	1	0.77	0.93426
1	3	5	2	1	2	2	3	2	2	4	4	1	1	1	2	0	0	0	0.77	0.93426
1	3	4	4	1	1	3	4	1	1	3	3	1	1	1	5	0	0	1	0.77	0.93426
1	3	2	5	2	2	2	9	2	1	5	3	1	1	NA	1	0	0	0	0.77	0.93426
1	3	3	3	1	3	2	3	3	5	4	3	1	1	4	4	0	0	0	0.77	0.93426
1	2	4	3	4	3	NA	3	4	5	4	4	1	1	4	1	0	0	0	0.77	0.93426
1	2	4	3	4	3	2	3	4	5	4	4	2	1	4	1	1	0	0	0.77	0.93426
1	3	4	4	1	1	3	4	1	1	3	3	1	1	1	2	0	0	1	0.77	0.93426
1	3	4	4	1	1	3	4	1	1	3	3	1	1	1	3	0	0	0	0.77	0.93426
1	3	5	3	5	3	2	4	6	5	3	4	1	1	4	1	0	0	1	0.77	0.93426
1	3	5	3	1	2	2	3	2	2	4	4	1	1	1	6	0	0	1	0.77	0.93426
1	3	4	3	5	2	3	3	6	5	4	2	1	1	3	6	0	0	0	0.77	0.93426
1	3	5	2	1	2	2	3	2	2	5	4	3	1	1	4	0	0	0	0.77	0.93426
1	3	4	3	3	2	3	3	2	1	3	5	7	1	3	5	0	1	1	0.77	0.93426
1	3	4	4	1	1	3	4	1	1	3	3	1	1	1	4	0	0	1	0.77	0.93426
1	1	5	2	1	NA	2	2	2	2	4	3	2	1	1	4	1	0	0	0.77	0.93426
1	3	4	4	1	1	3	4	1	1	3	3	2	1	1	6	1	0	0	0.77	0.93426
3	3	2	2	1	NA	2	2	3	2	4	3	1	1	1	4	0	0	0	0.77	0.93426
1	3	4	4	1	1	3	4	1	1	5	3	2	1	1	2	1	0	0	0.77	0.93426
1	3	4	4	1	1	3	1	1	1	3	3	1	1	1	3	0	0	1	0.77	0.93426
1	3	4	4	1	1	3	4	1	1	3	3	2	1	1	3	1	0	0	0.77	0.93426
1	3	4	3	5	2	3	3	6	5	4	2	1	1	3	6	0	0	0	0.77	0.93426
1	1	5	4	2	2	2	3	1	2	4	3	1	1	4	1	0	0	1	0.77	0.93426
2	2	5	4	2	9	2	3	1	1	4	3	1	1	3	3	0	0	0	0.77	0.93426
1	1	2	3	3	2	2	9	1	1	1	3	1	1	4	1	0	0	1	0.77	0.93426
1	3	3	3	5	2	2	2	1	1	3	3	1	1	3	1	0	0	0	0.77	0.93426
1	2	5	4	2	2	2	9	2	2	3	3	1	1	4	2	0	0	0	0.77	0.93426
2	1	5	3	2	2	2	9	1	1	3	3	1	1	3	2	0	0	1	0.77	0.93426
1	1	5	4	2	2	2	9	1	2	3	3	1	1	4	2	0	0	0	0.77	0.93426
1	1	5	4	2	2	2	9	1	1	3	5	1	1	3	5	0	0	1	0.77	0.93426
1	3	3	4	3	2	2	9	1	1	4	3	1	1	3	2	0	0	0	0.77	0.93426
1	2	1	2	3	9	9	4	6	5	5	4	1	1	3	3	0	0	0	0.77	0.93426
2	3	3	3	3	3	3	4	5	1	3	4	1	1	3	1	0	0	0	0.77	0.93426
1	1	1	1	3	9	3	1	1	4	1	4	2	1	NA	2	1	0	0	0.77	0.93426
1	3	5	2	5	1	2	3	6	1	NA	2	1	1	NA	1	0	0	0	0.77	0.93426
1	3	3	2	4	3	9	4	5	2	4	4	2	1	5	1	1	0	0	0.77	0.93426
1	3	5	3	2	2	3	2	2	2	5	5	1	1	2	5	0	0	0	0.77	0.93426
1	1	5	4	1	2	9	1	1	1	1	2	1	1	4	2	0	0	0	0.77	0.93426
1	1	1	3	2	3	3	1	1	1	3	4	1	1	2	2	0	0	0	0.77	0.93426
1	2	4	2	3	3	1	4	5	2	4	3	1	1	4	2	0	0	0	0.77	0.93426
1	2	4	5	2	2	1	2	6	1	3	4	1	1	4	1	0	0	1	0.77	0.93426
1	2	1	4	3	1	2	4	1	1	3	2	1	1	3	2	0	0	1	0.77	0.93426
2	2	1	3	3	1	9	3	3	2	3	3	1	1	3	2	0	0	0	0.77	0.93426
1	1	1	2	2	1	2	1	1	2	4	2	1	1	1	1	0	0	0	0.77	0.93426
1	2	3	4	1	2	2	3	5	1	1	2	2	1	5	2	1	0	1	0.77	0.93426
2	3	3	5	5	2	9	3	3	1	1	3	1	1	2	3	0	0	0	0.77	0.93426
1	1	5	3	5	4	9	4	5	1	1	3	1	1	NA	3	0	0	1	0.77	0.93426
2	3	6	3	2	3	1	2	3	1	5	1	1	1	3	3	0	0	0	0.77	0.93426
1	1	3	3	2	1	2	9	6	2	4	3	1	1	3	4	0	0	1	0.77	0.93426
2	1	2	4	5	3	1	4	4	1	1	2	1	1	2	2	0	0	0	0.77	0.93426
2	1	6	3	3	3	1	2	6	1	3	3	1	1	4	6	0	0	1	0.77	0.93426
2	NA	5	3	2	2	1	2	5	1	3	3	1	1	3	3	0	0	1	0.77	0.93426
2	1	3	3	2	3	1	3	6	1	4	3	1	1	4	3	0	0	1	0.77	0.93426
1	2	2	4	1	2	1	3	5	1	3	3	1	1	3	4	0	0	0	0.77	0.93426
2	1	5	3	3	3	1	2	6	5	4	5	1	1	3	2	0	0	1	0.77	0.93426
2	3	2	3	5	3	1	2	5	2	4	2	1	1	3	1	0	0	1	0.77	0.93426
1	1	6	3	2	3	1	9	6	5	5	3	1	1	4	1	0	0	0	0.77	0.93426
1	3	3	3	3	3	1	9	NA	1	3	3	1	1	3	2	0	0	1	0.77	0.93426
1	2	2	5	3	9	1	9	6	5	3	3	1	1	4	1	0	0	1	0.77	0.93426
2	3	5	3	5	2	1	2	5	2	4	2	1	1	3	6	0	0	0	0.77	0.93426
1	3	5	3	3	3	1	9	6	1	4	3	1	1	4	2	0	0	0	0.77	0.93426
1	NA	5	3	NA	3	2	2	3	2	4	3	2	1	3	3	1	0	1	0.77	0.93426
1	2	2	3	3	2	3	2	5	1	3	3	1	1	4	1	0	0	0	0.77	0.93426
1	2	5	2	3	3	1	9	6	1	1	3	1	1	3	3	0	0	0	0.77	0.93426
1	1	3	3	3	2	2	2	6	1	4	3	1	1	4	3	0	0	1	0.77	0.93426
1	1	3	4	2	3	1	2	5	2	2	3	1	1	3	4	0	0	0	0.77	0.93426
1	1	5	3	2	1	2	9	5	1	4	2	2	1	3	6	1	0	0	0.77	0.93426
1	1	5	4	3	2	3	2	4	1	2	3	1	1	3	2	0	0	1	0.77	0.93426
2	3	3	4	3	2	3	2	3	2	2	3	1	1	3	6	0	0	0	0.77	0.93426
2	1	6	1	3	1	1	4	6	1	4	2	1	1	3	6	0	0	1	0.77	0.93426
1	1	2	2	3	3	1	4	6	1	4	3	1	1	4	4	0	0	0	0.77	0.93426
1	3	5	4	5	2	2	9	5	1	4	4	1	1	4	6	0	0	0	0.77	0.93426
2	1	2	4	2	2	1	4	5	2	3	2	1	1	3	4	0	0	1	0.77	0.93426
1	1	5	3	2	2	2	4	6	5	2	2	1	1	2	3	0	0	0	0.77	0.93426
1	3	5	3	3	9	9	2	3	1	3	3	1	1	3	4	0	0	1	0.77	0.93426
1	1	3	2	2	9	9	4	5	5	1	3	2	1	3	1	1	0	1	0.77	0.93426
1	1	5	5	5	4	1	9	6	1	5	5	1	1	3	6	0	0	0	0.77	0.93426
1	1	2	3	2	1	2	1	1	1	5	3	1	1	4	3	0	0	1	0.77	0.93426
1	1	6	3	2	2	9	9	5	2	3	5	1	1	3	4	0	0	1	0.77	0.93426
1	3	4	3	5	2	4	4	5	5	4	3	1	1	3	6	0	0	1	0.77	0.93426
3	1	5	3	5	2	1	9	5	1	3	5	1	1	4	2	0	0	0	0.77	0.93426
1	3	4	4	1	1	3	4	1	1	3	3	2	1	1	1	1	0	1	0.77	0.93426
1	1	5	3	3	4	1	4	5	1	3	5	2	1	3	3	1	0	1	0.77	0.93426
1	3	5	2	1	2	2	3	2	2	4	4	1	1	1	6	0	0	0	0.77	0.93426
1	1	1	4	2	2	2	3	5	1	2	2	2	1	3	3	1	0	1	0.77	0.93426
1	3	5	3	2	2	1	2	5	5	5	3	1	1	3	4	0	0	0	0.77	0.93426
1	3	2	3	3	9	4	3	NA	5	2	3	1	1	3	4	0	0	0	0.77	0.93426
1	1	5	3	5	3	2	9	5	1	3	5	1	1	4	4	0	0	0	0.77	0.93426
1	1	1	2	4	2	2	4	1	1	2	1	1	1	5	1	0	0	0	0.77	0.93426
1	3	1	5	1	2	9	1	6	5	4	2	1	1	3	3	0	0	1	0.77	0.93426
3	3	1	5	2	9	9	2	2	1	5	5	1	1	3	6	0	0	1	0.77	0.93426
1	3	1	3	1	1	3	3	6	5	5	2	1	1	NA	6	0	0	0	0.77	0.93426
1	1	1	3	3	2	1	9	6	5	4	1	1	1	1	1	0	0	0	0.77	0.93426
1	3	6	3	2	1	3	3	1	5	2	3	1	1	4	2	0	0	0	0.77	0.93426
1	1	5	5	1	9	1	2	5	5	2	3	1	1	3	1	0	0	1	0.77	0.93426
1	3	1	4	1	1	1	3	6	5	3	2	1	1	3	2	0	0	0	0.77	0.93426
1	2	1	3	5	1	2	9	6	5	5	5	1	1	1	4	0	0	1	0.77	0.93426
1	3	3	1	1	3	9	2	6	5	3	2	1	1	3	6	0	0	0	0.77	0.93426
1	3	1	5	1	1	2	9	4	5	5	3	1	1	2	1	0	0	1	0.77	0.93426
1	1	1	5	1	1	2	9	6	5	4	2	1	1	3	6	0	0	0	0.77	0.93426
1	2	2	2	1	3	9	3	6	5	4	3	1	1	4	1	0	0	0	0.77	0.93426
1	1	1	4	5	1	9	9	6	5	1	2	1	1	NA	3	0	0	1	0.77	0.93426
1	1	2	2	3	2	9	2	2	2	2	4	1	1	3	2	0	0	0	0.77	0.93426
1	1	5	5	1	NA	2	1	1	5	1	3	1	1	2	4	0	0	1	0.77	0.93426
2	3	1	3	3	1	2	4	6	5	4	2	1	1	1	2	0	0	0	0.77	0.93426
3	3	1	3	2	2	1	9	6	5	4	3	1	1	NA	3	0	0	0	0.77	0.93426
1	3	1	5	1	2	9	1	6	5	4	2	1	1	3	6	0	0	1	0.77	0.93426
3	NA	6	5	3	9	9	3	6	5	5	2	1	1	4	2	0	0	0	0.77	0.93426
1	3	1	3	1	2	9	1	6	2	4	2	1	1	NA	2	0	0	1	0.77	0.93426
1	2	4	4	4	3	1	4	5	1	3	1	1	2	4	2	1	1	1	0.06	0.94096
1	3	5	4	1	3	2	9	1	1	3	2	1	2	3	1	1	1	0	0.06	0.94096
1	2	4	5	3	2	9	2	2	1	2	3	2	2	5	1	0	1	0	0.06	0.94096
1	1	3	3	1	1	2	1	1	1	4	1	3	2	4	1	0	0	0	0.06	0.94096
1	2	4	1	3	3	2	4	5	1	1	1	3	2	2	1	0	1	1	0.06	0.94096
1	2	4	2	3	2	2	3	5	2	3	3	3	2	2	1	0	1	0	0.06	0.94096
1	1	5	2	3	1	9	2	2	1	1	1	4	2	3	2	0	1	0	0.06	0.94096
1	2	4	2	3	3	2	3	5	1	2	1	5	2	4	1	0	1	1	0.06	0.94096
1	1	3	1	2	2	3	3	4	2	3	1	3	2	2	1	0	1	0	0.06	0.94096
1	2	4	3	5	9	1	2	2	2	5	3	1	2	2	2	1	1	0	0.06	0.94096
1	2	3	2	3	2	2	4	5	1	2	2	6	2	3	2	0	1	1	0.06	0.94096
1	3	3	2	3	2	3	1	1	4	1	2	3	2	4	1	0	1	0	0.06	0.94096
1	3	3	3	5	2	3	2	3	3	1	2	3	2	4	1	0	1	0	0.06	0.94096
1	3	1	2	2	3	9	9	5	1	5	4	3	2	4	4	0	1	0	0.06	0.94096
1	1	5	3	2	2	1	3	1	3	2	3	2	2	4	1	0	1	0	0.06	0.94096
1	2	5	2	2	2	2	3	5	1	2	1	1	2	3	3	1	1	0	0.06	0.94096
1	2	3	2	3	3	2	4	5	1	2	1	1	2	3	3	1	1	1	0.06	0.94096
1	3	5	3	3	2	2	1	1	3	4	4	3	2	4	3	0	1	1	0.06	0.94096
1	3	5	4	5	2	1	3	2	2	5	2	3	2	4	1	0	1	0	0.06	0.94096
1	3	3	3	5	2	9	2	6	5	1	3	3	2	4	1	0	1	1	0.06	0.94096
2	2	2	3	1	NA	2	1	3	3	2	1	3	2	3	2	0	0	0	0.06	0.94096
2	1	6	4	2	2	3	1	5	5	4	4	3	2	3	2	0	1	1	0.06	0.94096
1	2	5	5	2	2	3	2	3	5	2	3	3	2	5	2	0	1	0	0.06	0.94096
1	3	1	4	5	2	2	2	3	3	1	3	3	2	4	1	0	1	0	0.06	0.94096
1	2	4	4	5	3	3	9	2	5	2	3	3	2	4	1	0	1	0	0.06	0.94096
1	3	2	3	5	1	9	3	1	5	3	2	7	2	5	2	0	1	0	0.06	0.94096
1	1	5	4	3	2	2	1	2	5	3	2	3	2	3	2	0	1	0	0.06	0.94096
1	2	5	4	3	2	1	4	1	1	3	3	3	2	3	3	0	1	1	0.06	0.94096
1	2	5	2	5	1	3	4	2	5	2	2	4	2	4	1	0	1	0	0.06	0.94096
3	2	4	2	3	2	4	1	4	2	3	4	3	2	NA	2	0	1	0	0.06	0.94096
1	2	4	4	3	2	3	4	1	4	2	4	3	2	4	1	0	1	1	0.06	0.94096
1	1	1	2	3	1	1	1	4	3	3	1	3	2	3	1	0	1	1	0.06	0.94096
1	3	1	4	3	1	2	1	1	3	4	2	3	2	4	1	0	1	0	0.06	0.94096
1	3	6	4	5	3	2	1	1	4	5	4	3	2	5	1	0	1	0	0.06	0.94096
3	3	6	5	5	9	9	9	6	5	5	5	1	2	NA	1	1	1	0	0.06	0.94096
1	1	2	3	1	2	2	3	5	1	1	4	3	2	3	1	0	1	1	0.06	0.94096
1	3	3	3	5	2	9	9	5	5	5	3	3	2	NA	1	0	1	0	0.06	0.94096
1	1	5	4	5	1	9	1	6	5	5	4	3	2	5	1	0	1	0	0.06	0.94096
2	2	3	3	3	3	2	3	4	4	3	4	2	2	NA	4	0	1	0	0.06	0.94096
2	2	3	3	3	3	2	3	4	3	2	4	3	2	3	1	0	1	1	0.06	0.94096
1	1	4	2	4	1	3	1	4	3	1	1	8	2	4	2	0	1	0	0.06	0.94096
1	3	3	5	3	2	3	9	5	5	3	4	3	2	3	1	0	1	0	0.06	0.94096
1	3	2	3	5	3	9	1	4	2	5	4	3	2	3	2	0	1	0	0.06	0.94096
2	2	3	2	3	3	2	4	3	3	2	2	9	2	3	1	0	1	0	0.06	0.94096
3	2	4	5	NA	4	9	1	2	1	5	4	10	2	1	1	0	1	1	0.06	0.94096
1	1	3	2	4	4	1	3	5	2	3	4	3	2	3	1	0	1	1	0.06	0.94096
1	2	4	3	3	3	1	2	5	1	5	4	1	2	5	1	1	1	0	0.06	0.94096
1	2	5	4	1	3	1	4	5	1	4	2	1	2	4	1	1	1	1	0.06	0.94096
1	1	5	4	1	2	3	2	1	4	4	2	3	2	4	1	0	1	1	0.06	0.94096
1	1	5	4	1	3	3	1	1	4	4	3	3	2	4	2	0	1	1	0.06	0.94096
1	1	1	3	3	3	1	2	6	5	4	4	3	2	4	1	0	1	1	0.06	0.94096
1	2	5	3	5	3	2	2	5	5	5	3	3	2	NA	1	0	1	0	0.06	0.94096
1	3	6	5	5	9	9	4	1	5	4	2	3	2	5	1	0	1	1	0.06	0.94096
1	1	5	4	1	1	2	1	2	3	4	4	4	2	5	1	0	1	1	0.06	0.94096
1	1	6	4	5	3	9	9	6	5	4	4	3	2	3	1	0	1	1	0.06	0.94096
2	3	5	2	2	NA	9	2	5	2	5	1	3	2	5	1	0	1	1	0.06	0.94096
1	2	4	3	5	2	3	1	1	3	4	3	3	2	NA	1	0	1	0	0.06	0.94096
1	3	2	3	3	3	9	4	5	2	2	5	3	2	5	1	0	1	0	0.06	0.94096
1	2	3	5	5	2	3	2	6	1	5	3	3	2	4	1	0	1	0	0.06	0.94096
1	2	5	3	5	2	1	4	1	2	2	4	5	2	4	1	0	1	0	0.06	0.94096
1	2	5	4	2	3	2	1	5	1	4	4	3	2	4	1	0	1	1	0.06	0.94096
1	1	5	2	3	4	1	9	5	1	3	4	3	2	4	2	0	1	1	0.06	0.94096
1	3	5	4	5	4	1	1	4	2	1	4	3	2	3	4	0	1	0	0.06	0.94096
1	3	2	1	1	1	1	1	5	1	1	2	3	2	5	1	0	1	0	0.06	0.94096
1	3	5	4	3	4	4	3	6	4	5	3	1	2	NA	1	1	1	0	0.06	0.94096
1	3	1	3	3	2	3	2	2	4	1	4	3	2	4	1	0	1	1	0.06	0.94096
1	3	5	2	3	3	2	2	2	5	3	3	3	2	2	6	0	0	0	0.06	0.94096
1	2	3	3	1	3	2	3	2	1	1	2	1	2	4	1	1	0	0	0.06	0.94096
1	1	4	3	5	2	3	1	1	1	4	4	3	2	3	4	0	0	0	0.06	0.94096
1	1	5	5	3	1	3	9	6	2	4	3	1	2	4	2	1	0	0	0.06	0.94096
1	1	5	3	3	3	3	2	2	1	4	2	3	2	3	6	0	0	1	0.06	0.94096
1	2	1	3	1	3	1	2	3	1	4	3	3	2	3	2	0	0	1	0.06	0.94096
1	2	5	3	3	3	9	1	5	1	2	2	3	2	3	3	0	0	0	0.06	0.94096
1	2	2	3	4	3	3	3	2	5	3	2	3	2	3	6	0	0	1	0.06	0.94096
1	1	5	4	3	2	9	1	1	3	3	2	3	2	3	2	0	0	1	0.06	0.94096
1	2	5	4	3	3	2	3	1	1	2	3	3	2	4	2	0	0	1	0.06	0.94096
1	2	4	3	1	3	1	9	3	5	4	1	3	2	1	4	0	0	1	0.06	0.94096
1	2	5	3	5	1	9	1	1	3	1	2	3	2	3	6	0	0	1	0.06	0.94096
1	1	NA	4	1	2	1	2	2	2	3	2	3	2	4	4	0	0	1	0.06	0.94096
1	2	5	3	5	2	1	4	2	1	2	3	3	2	3	1	0	0	0	0.06	0.94096
1	1	5	4	1	2	3	1	1	4	1	4	3	2	NA	4	0	0	0	0.06	0.94096
1	3	3	2	3	4	9	9	6	5	3	4	3	2	4	2	0	0	1	0.06	0.94096
1	3	3	5	5	3	9	2	5	2	2	2	3	2	4	2	0	0	0	0.06	0.94096
1	2	2	1	3	1	9	1	4	3	3	3	3	2	4	4	0	0	1	0.06	0.94096
1	3	1	3	2	1	3	1	1	1	5	2	1	2	1	3	1	0	0	0.06	0.94096
1	2	4	2	3	2	3	4	5	1	2	1	3	2	4	4	0	0	0	0.06	0.94096
1	2	3	3	1	3	1	4	5	3	3	4	3	2	5	1	0	0	0	0.06	0.94096
1	1	1	4	3	3	1	1	1	1	2	3	1	2	4	6	1	0	0	0.06	0.94096
1	3	NA	4	3	9	9	1	1	4	4	4	5	2	3	1	0	0	0	0.06	0.94096
1	2	5	2	4	2	3	3	5	1	NA	1	1	2	3	4	1	0	0	0.06	0.94096
1	2	1	4	1	3	1	1	2	1	4	2	6	2	3	2	0	0	0	0.06	0.94096
1	1	4	5	5	1	9	1	1	4	5	3	3	2	5	1	0	0	0	0.06	0.94096
1	2	1	3	1	3	1	2	3	1	4	3	1	2	3	6	1	0	0	0.06	0.94096
1	2	3	3	5	2	3	9	2	1	3	2	3	2	5	3	0	0	0	0.06	0.94096
1	2	3	3	1	3	1	3	5	3	3	4	1	2	5	1	1	0	0	0.06	0.94096
1	1	5	2	3	2	2	3	3	1	2	1	6	2	5	3	0	0	0	0.06	0.94096
1	2	5	5	5	1	2	1	1	1	5	3	3	2	3	3	0	0	0	0.06	0.94096
1	1	5	3	3	2	3	1	4	2	2	4	1	2	2	4	1	0	1	0.06	0.94096
2	2	5	4	1	2	2	2	3	3	2	3	3	2	5	4	0	0	1	0.06	0.94096
1	2	2	3	3	2	3	2	1	1	2	2	1	2	4	4	1	0	0	0.06	0.94096
1	2	3	2	2	1	4	2	1	3	2	2	3	2	3	4	0	0	1	0.06	0.94096
1	1	3	3	3	2	3	3	5	1	2	2	2	2	3	2	0	0	0	0.06	0.94096
1	1	1	2	3	1	2	1	1	1	2	4	2	2	5	1	0	0	0	0.06	0.94096
1	1	4	4	2	2	9	1	1	3	3	4	3	2	4	2	0	0	0	0.06	0.94096
1	2	3	2	3	3	2	4	6	1	1	2	1	2	3	6	1	0	0	0.06	0.94096
1	1	5	2	3	1	9	2	1	3	2	2	3	2	3	3	0	0	1	0.06	0.94096
1	1	5	1	3	2	2	2	2	2	NA	1	3	2	3	2	0	0	0	0.06	0.94096
1	3	2	3	2	2	2	2	5	2	2	4	1	2	3	2	1	0	0	0.06	0.94096
2	2	4	3	4	1	9	4	6	1	3	2	6	2	2	6	0	0	0	0.06	0.94096
1	2	3	3	3	2	2	3	5	1	2	2	1	2	3	3	1	0	0	0.06	0.94096
1	1	4	3	3	2	3	3	5	1	2	1	1	2	3	3	1	0	0	0.06	0.94096
1	3	5	3	5	2	1	2	1	5	5	3	1	2	3	3	1	0	0	0.06	0.94096
1	3	2	3	5	2	3	2	1	3	3	3	3	2	4	1	0	0	0	0.06	0.94096
1	2	5	3	2	3	1	9	6	1	1	2	1	2	NA	4	1	0	0	0.06	0.94096
1	2	3	2	2	2	3	2	1	3	2	2	4	2	3	6	0	0	1	0.06	0.94096
1	2	1	3	4	3	2	4	5	1	2	3	1	2	2	6	1	0	1	0.06	0.94096
1	2	3	2	3	2	3	3	5	1	1	2	1	2	3	3	1	0	0	0.06	0.94096
1	2	4	2	3	2	2	4	5	1	2	2	6	2	3	6	0	0	0	0.06	0.94096
1	2	4	2	4	2	3	3	1	1	2	2	3	2	2	6	0	0	1	0.06	0.94096
1	2	6	2	3	3	2	4	5	1	2	2	1	2	3	6	1	0	1	0.06	0.94096
1	2	4	4	1	4	1	4	5	1	2	3	1	2	2	6	1	0	1	0.06	0.94096
1	1	5	1	4	3	2	3	3	1	3	2	3	2	3	1	0	0	1	0.06	0.94096
1	2	1	1	5	1	3	1	1	1	5	1	2	2	4	6	0	0	0	0.06	0.94096
1	3	1	3	3	1	3	1	1	1	5	1	1	2	2	6	1	0	0	0.06	0.94096
1	1	1	4	3	1	1	1	1	1	1	1	1	2	4	3	1	0	1	0.06	0.94096
1	2	4	2	3	1	4	1	1	1	5	1	1	2	3	1	1	0	1	0.06	0.94096
1	2	5	5	5	1	4	4	5	5	5	1	4	2	2	6	0	0	0	0.06	0.94096
1	2	3	3	3	1	3	2	5	5	2	2	5	2	3	4	0	0	0	0.06	0.94096
1	2	3	3	5	2	3	2	4	4	4	4	1	2	1	6	1	0	0	0.06	0.94096
1	2	5	2	4	9	1	9	5	5	5	2	1	2	3	6	1	0	1	0.06	0.94096
NA	2	3	2	4	2	1	3	5	2	3	2	1	2	3	1	1	0	1	0.06	0.94096
1	3	4	3	5	2	2	2	1	2	5	3	3	2	2	1	0	0	0	0.06	0.94096
1	1	1	3	1	1	2	1	1	1	1	1	1	2	3	3	1	0	1	0.06	0.94096
1	2	6	3	3	4	1	4	6	5	2	3	1	2	2	6	1	1	1	0.06	0.94096
1	2	5	1	4	9	9	4	5	5	5	5	4	2	3	5	0	1	0	0.06	0.94096
1	2	4	4	3	3	1	3	NA	1	2	2	1	2	3	5	1	1	1	0.06	0.94096
1	2	3	2	5	3	3	3	3	2	5	3	1	2	3	5	1	1	0	0.06	0.94096
1	2	5	2	4	2	4	4	5	5	5	1	1	2	2	4	1	1	0	0.06	0.94096
1	2	5	2	2	3	2	2	5	1	2	2	6	2	2	4	0	1	1	0.06	0.94096
1	2	5	1	4	9	9	4	5	5	1	1	4	2	4	4	0	1	1	0.06	0.94096
1	2	5	2	3	3	2	3	5	1	2	2	1	2	2	3	1	1	0	0.06	0.94096
1	1	5	5	3	2	3	9	4	3	5	5	1	2	3	6	1	1	0	0.06	0.94096
1	2	4	1	2	2	2	2	1	1	1	1	1	2	4	3	1	1	1	0.06	0.94096
1	2	3	2	4	3	2	3	6	2	2	1	1	2	NA	4	1	1	0	0.06	0.94096
1	1	6	4	5	1	3	2	3	3	5	5	1	2	2	6	1	1	0	0.06	0.94096
1	2	4	2	4	9	1	3	5	5	5	1	1	2	3	6	1	1	1	0.06	0.94096
1	2	5	2	1	2	3	2	5	3	4	3	1	2	5	5	1	1	1	0.06	0.94096
1	2	NA	2	4	3	2	4	5	5	5	1	1	2	5	4	1	1	1	0.06	0.94096
1	2	5	5	4	3	1	3	5	5	5	3	1	2	3	5	1	1	0	0.06	0.94096
1	2	4	2	3	3	2	2	5	1	2	2	1	2	2	3	1	1	0	0.06	0.94096
1	1	3	2	1	1	9	2	3	3	5	3	4	2	5	6	0	1	1	0.06	0.94096
1	2	3	3	3	9	9	9	6	2	2	2	1	2	3	4	1	1	1	0.06	0.94096
2	2	5	3	2	2	3	2	4	3	5	4	5	2	1	6	0	1	0	0.06	0.94096
1	2	6	5	4	9	3	2	3	1	1	3	1	2	1	4	1	1	0	0.06	0.94096
1	2	5	1	3	3	2	3	4	1	2	4	1	2	3	3	1	1	1	0.06	0.94096
1	1	6	3	2	2	2	2	2	2	3	1	99	2	3	6	0	1	0	0.06	0.94096
1	3	3	1	5	1	4	3	6	5	5	1	99	2	4	3	0	1	0	0.06	0.94096
1	2	3	5	3	2	4	9	5	2	3	2	1	2	4	6	1	1	0	0.06	0.94096
1	3	3	5	4	2	3	3	5	5	NA	2	99	2	3	6	0	1	1	0.06	0.94096
1	2	4	3	2	9	9	9	6	1	5	2	4	2	3	4	0	1	0	0.06	0.94096
1	1	1	3	1	1	1	1	1	1	1	3	2	2	3	6	0	1	0	0.06	0.94096
1	2	3	2	1	3	9	9	6	3	2	5	4	2	1	6	0	1	0	0.06	0.94096
1	2	3	3	5	2	2	9	5	2	5	3	1	2	2	6	1	1	1	0.06	0.94096
1	2	3	4	3	9	9	9	6	3	5	2	1	2	1	6	1	1	1	0.06	0.94096
1	2	5	2	4	4	2	2	5	5	2	1	1	2	2	4	1	1	1	0.06	0.94096
2	2	5	5	3	2	2	2	2	3	5	4	4	2	1	6	0	1	0	0.06	0.94096
1	1	4	3	1	2	3	1	1	1	5	1	1	2	3	3	1	1	1	0.06	0.94096
1	2	3	2	5	2	3	3	5	1	5	1	1	2	3	3	1	1	0	0.06	0.94096
NA	2	3	2	5	2	3	3	6	1	2	2	5	2	3	3	0	1	0	0.06	0.94096
1	3	6	4	1	2	1	2	6	5	5	5	1	3	4	1	0	1	0	2.35	0.75323
1	3	5	3	5	3	9	9	3	1	5	2	1	3	4	2	0	1	0	2.35	0.75323
1	1	5	3	1	3	9	3	1	1	4	4	3	3	2	1	0	1	0	2.35	0.75323
1	2	5	3	1	1	4	3	2	1	4	3	2	3	4	2	0	1	0	2.35	0.75323
3	1	5	5	3	1	3	2	5	2	4	2	4	3	2	2	0	1	0	2.35	0.75323
1	1	4	3	5	2	1	9	1	5	2	3	1	3	4	2	0	1	0	2.35	0.75323
1	1	5	3	1	3	9	1	1	2	4	5	1	3	3	1	0	1	0	2.35	0.75323
1	1	2	3	5	2	3	2	1	3	3	3	2	3	2	5	0	0	0	2.35	0.75323
1	3	5	3	1	2	3	3	3	5	2	1	3	3	2	5	0	0	0	2.35	0.75323
1	3	5	3	5	3	1	9	3	1	5	5	1	3	4	5	0	1	1	2.35	0.75323
1	1	6	4	1	3	2	4	NA	2	5	1	6	3	3	5	0	0	1	2.35	0.75323
1	3	1	3	5	1	4	1	1	3	4	1	1	3	1	5	0	0	0	2.35	0.75323
1	3	5	4	3	1	9	2	5	3	4	4	2	3	3	1	0	1	1	2.35	0.75323
1	1	5	3	3	4	1	1	4	1	4	5	7	3	2	5	1	1	0	2.35	0.75323
1	3	3	4	5	1	9	1	2	1	5	5	2	3	3	1	0	1	1	2.35	0.75323
1	1	5	3	5	4	2	2	5	1	4	4	8	3	3	1	0	0	0	2.35	0.75323
1	2	3	1	3	2	3	1	1	3	3	2	2	3	4	2	0	0	0	2.35	0.75323
1	3	5	4	1	9	1	9	1	5	4	3	4	3	NA	1	0	0	0	2.35	0.75323
1	1	1	2	3	1	1	1	2	3	2	3	1	3	3	1	0	0	0	2.35	0.75323
2	3	2	3	5	2	2	9	6	5	5	2	1	3	3	1	0	0	0	2.35	0.75323
1	3	5	4	4	1	1	3	3	1	4	3	4	3	4	1	0	0	0	2.35	0.75323
1	1	5	3	3	2	9	1	3	3	4	3	9	3	3	1	0	0	0	2.35	0.75323
1	3	3	3	5	2	4	1	1	3	5	3	2	3	3	1	0	0	0	2.35	0.75323
1	3	6	5	3	9	2	4	5	1	5	4	4	3	3	1	0	0	0	2.35	0.75323
1	1	1	2	3	2	2	2	2	3	2	1	1	3	2	1	0	0	0	2.35	0.75323
1	3	1	2	3	1	2	1	1	5	5	5	1	3	4	4	0	0	1	2.35	0.75323
1	3	5	NA	5	9	9	9	6	1	2	2	8	3	3	4	0	0	1	2.35	0.75323
1	3	6	3	3	9	2	9	5	1	4	5	1	3	3	4	0	0	1	2.35	0.75323
1	3	6	4	5	9	9	9	6	2	5	4	8	3	2	4	0	0	1	2.35	0.75323
1	NA	1	5	3	1	2	3	1	2	NA	1	1	3	3	3	0	0	1	2.35	0.75323
1	3	5	4	1	9	9	2	6	2	5	2	2	3	3	4	0	0	1	2.35	0.75323
1	NA	1	2	5	1	3	1	1	NA	3	4	1	3	2	3	0	0	1	2.35	0.75323
1	3	5	3	5	9	9	9	6	1	2	2	8	3	3	4	0	0	1	2.35	0.75323
1	3	3	2	3	2	2	2	1	3	2	2	2	3	2	1	0	0	1	2.35	0.75323
1	3	1	3	1	2	1	1	1	3	5	3	1	3	2	1	0	0	1	2.35	0.75323
2	2	2	1	2	1	9	1	1	2	3	3	1	3	4	1	0	0	1	2.35	0.75323
1	1	3	4	1	NA	2	2	1	1	4	1	1	3	NA	1	0	1	1	2.35	0.75323
1	3	5	1	3	4	1	3	6	1	5	3	8	3	4	1	0	0	1	2.35	0.75323
1	3	1	5	5	9	9	1	5	4	4	3	1	3	1	1	0	0	1	2.35	0.75323
1	1	5	3	5	4	1	4	5	1	3	4	1	3	3	4	0	1	1	2.35	0.75323
1	3	5	3	5	3	2	4	5	1	3	4	1	3	3	4	0	1	1	2.35	0.75323
1	2	4	4	3	3	9	4	5	1	2	2	3	3	3	4	0	1	1	2.35	0.75323
1	3	3	3	5	3	9	3	5	1	5	3	8	3	NA	3	0	1	1	2.35	0.75323
1	3	5	4	1	3	3	9	5	5	5	5	6	3	3	3	0	1	1	2.35	0.75323
1	3	5	4	2	2	3	2	2	3	4	2	7	3	2	4	1	1	1	2.35	0.75323
1	1	4	4	1	3	3	3	3	1	1	2	1	3	4	4	0	1	1	2.35	0.75323
1	1	3	2	5	4	1	9	5	1	1	3	8	3	3	4	0	1	1	2.35	0.75323
1	1	3	2	5	4	1	9	5	1	1	3	8	3	3	4	0	1	1	2.35	0.75323
1	1	5	4	3	1	3	2	2	1	1	3	4	3	4	2	0	0	0	2.35	0.75323
1	3	5	3	5	3	3	3	1	1	4	4	4	3	4	1	0	0	0	2.35	0.75323
1	1	5	3	5	4	2	4	6	1	1	2	4	3	4	6	0	1	1	2.35	0.75323
1	1	2	3	2	3	3	3	3	1	3	3	1	3	4	1	0	1	1	2.35	0.75323
3	3	5	3	5	9	9	9	6	3	5	3	1	3	5	1	0	0	1	2.35	0.75323
1	3	1	1	5	1	9	1	5	3	1	3	1	3	2	1	0	0	0	2.35	0.75323
1	3	1	2	5	1	3	1	3	3	3	4	1	3	2	1	0	0	0	2.35	0.75323
1	1	2	2	3	3	2	2	3	5	5	3	8	3	3	4	0	1	0	2.35	0.75323
1	1	3	3	5	9	2	9	6	1	5	1	8	3	3	3	0	1	0	2.35	0.75323
1	NA	5	4	1	1	9	2	1	5	5	3	2	3	4	1	0	1	0	2.35	0.75323
1	1	3	4	3	3	1	2	4	1	3	1	1	3	3	1	0	1	0	2.35	0.75323
1	1	3	4	1	2	9	1	1	3	5	3	8	3	3	1	0	1	0	2.35	0.75323
1	1	4	3	3	2	2	3	4	1	3	2	10	3	4	1	0	1	0	2.35	0.75323
1	3	5	3	1	9	9	9	6	1	2	2	8	3	3	4	0	0	1	2.35	0.75323
1	NA	1	4	3	1	2	1	1	2	NA	3	1	3	3	3	0	0	1	2.35	0.75323
1	3	5	3	5	9	9	9	6	1	5	2	8	3	3	4	0	0	1	2.35	0.75323
1	1	6	3	5	3	2	3	5	1	5	5	1	3	3	4	0	0	1	2.35	0.75323
1	2	6	1	4	3	1	9	5	1	1	5	1	3	3	4	0	0	1	2.35	0.75323
1	3	6	3	2	3	2	9	5	1	2	4	1	3	3	4	0	0	1	2.35	0.75323
1	1	5	3	3	9	9	9	6	1	2	2	8	3	3	3	0	0	1	2.35	0.75323
1	2	1	2	3	1	1	2	2	1	2	2	11	3	3	3	0	0	1	2.35	0.75323
1	2	4	2	4	3	2	4	6	1	3	3	8	3	3	4	0	0	1	2.35	0.75323
1	2	1	3	2	3	2	1	3	1	3	4	1	3	3	2	0	1	0	2.35	0.75323
1	1	6	3	3	2	9	9	6	5	5	3	2	3	NA	2	0	1	0	2.35	0.75323
1	3	5	4	2	2	4	1	1	3	4	2	1	3	2	2	0	1	0	2.35	0.75323
1	1	5	3	5	3	1	9	3	1	1	5	4	3	4	3	0	1	0	2.35	0.75323
2	3	2	3	1	2	1	2	5	5	3	3	2	3	NA	3	0	1	1	2.35	0.75323
1	1	5	4	3	1	5	1	1	4	5	3	1	3	4	2	0	1	1	2.35	0.75323
1	1	5	4	1	1	1	2	1	1	2	3	1	3	3	3	0	1	1	2.35	0.75323
1	3	4	4	5	2	1	2	3	1	1	2	1	3	4	3	0	1	1	2.35	0.75323
1	1	5	3	3	4	2	3	5	1	2	1	4	3	4	5	0	1	0	2.35	0.75323
1	1	1	3	2	2	3	2	4	5	5	3	10	3	2	5	0	1	0	2.35	0.75323
1	1	5	3	5	3	2	2	4	2	2	2	10	3	2	4	0	1	0	2.35	0.75323
1	1	6	2	5	9	3	9	6	1	5	2	1	3	2	6	0	0	1	2.35	0.75323
1	1	1	1	2	1	9	1	1	3	1	3	1	3	3	6	0	0	1	2.35	0.75323
1	1	6	3	1	4	1	4	6	1	4	1	8	3	3	6	0	0	1	2.35	0.75323
1	1	6	3	3	3	2	3	5	1	3	4	8	3	3	6	0	0	1	2.35	0.75323
1	1	5	3	1	3	2	3	4	1	1	4	8	3	3	6	0	0	1	2.35	0.75323
1	1	3	3	3	2	2	1	2	1	3	4	2	3	1	6	0	1	0	2.35	0.75323
1	2	4	3	3	2	3	3	3	2	2	2	10	3	2	6	0	0	0	2.35	0.75323
3	3	6	5	4	3	4	4	6	5	4	5	1	3	3	4	0	1	1	2.35	0.75323
1	3	6	3	2	1	3	2	2	2	5	3	8	3	3	6	0	0	0	2.35	0.75323
1	3	6	3	1	2	3	2	3	1	3	3	8	3	3	6	0	0	0	2.35	0.75323
1	1	6	3	2	2	3	2	4	1	3	4	8	3	3	6	0	0	0	2.35	0.75323
1	1	6	3	2	2	3	9	5	2	3	4	8	3	3	6	0	0	0	2.35	0.75323
1	3	6	3	3	2	3	9	5	1	3	4	8	3	2	6	0	0	0	2.35	0.75323
1	1	6	5	3	2	3	2	5	1	5	4	8	3	3	6	0	0	0	2.35	0.75323
1	1	2	4	3	4	2	3	4	2	3	2	10	3	3	4	0	1	1	2.35	0.75323
1	1	6	3	2	2	3	2	3	2	2	3	8	3	3	6	0	0	0	2.35	0.75323
1	3	5	3	5	2	1	2	2	5	5	5	1	3	2	6	0	0	0	2.35	0.75323
1	1	2	3	3	9	2	2	5	2	2	2	8	3	4	6	0	1	0	2.35	0.75323
1	2	5	5	1	9	9	9	5	1	5	3	8	3	2	6	0	1	0	2.35	0.75323
NA	1	6	4	1	NA	9	1	1	1	5	1	1	3	1	2	0	0	1	2.35	0.75323
1	3	1	5	5	9	9	1	5	4	4	3	4	3	2	2	0	0	1	2.35	0.75323
1	3	6	1	3	1	NA	1	1	3	1	4	1	3	2	3	0	0	1	2.35	0.75323
1	1	5	2	1	4	3	4	5	1	1	2	4	3	3	6	0	1	1	2.35	0.75323
1	2	4	4	3	2	9	3	5	1	2	3	6	3	NA	6	0	1	1	2.35	0.75323
1	1	5	3	3	3	2	3	4	1	1	2	8	3	3	6	0	1	1	2.35	0.75323
1	2	6	5	5	9	3	9	5	1	5	5	3	3	2	6	0	1	1	2.35	0.75323
1	1	1	2	2	3	2	3	4	1	2	3	10	3	3	6	0	0	1	2.35	0.75323
1	1	2	4	2	3	2	3	4	1	5	4	8	3	3	2	0	0	0	2.35	0.75323
1	2	6	2	NA	1	1	1	5	5	4	3	1	3	1	3	0	0	0	2.35	0.75323
1	2	4	5	5	4	2	4	2	2	5	4	12	3	NA	2	0	0	0	2.35	0.75323
1	3	6	1	5	1	9	1	1	1	1	5	1	3	1	1	0	0	0	2.35	0.75323
1	3	5	3	1	2	2	1	1	5	4	3	4	3	2	2	0	0	0	2.35	0.75323
1	3	5	3	1	1	9	1	1	3	3	3	4	3	2	2	0	0	0	2.35	0.75323
1	2	4	2	3	2	9	NA	NA	NA	4	2	4	3	3	2	0	0	0	2.35	0.75323
1	3	5	4	5	9	9	2	6	5	5	2	2	3	3	2	0	0	0	2.35	0.75323
1	3	5	3	5	2	3	2	5	1	3	2	10	3	3	4	0	0	0	2.35	0.75323
1	1	5	5	2	3	2	9	5	1	1	5	1	3	3	4	0	0	0	2.35	0.75323
2	3	6	4	3	9	2	4	6	2	5	1	1	3	NA	3	0	0	0	2.35	0.75323
1	3	6	3	5	3	2	4	6	1	3	3	1	3	2	4	0	0	0	2.35	0.75323
1	3	5	5	5	3	2	1	5	1	2	2	8	3	3	4	0	0	0	2.35	0.75323
1	1	6	3	1	4	1	3	5	1	4	3	8	3	3	5	0	0	1	2.35	0.75323
1	1	1	2	1	2	2	1	3	1	2	2	10	3	2	5	0	1	0	2.35	0.75323
1	1	1	4	1	4	1	2	4	1	1	3	1	3	4	4	0	1	0	2.35	0.75323
1	2	3	3	3	2	2	3	1	1	4	3	8	3	3	2	0	0	0	2.35	0.75323
1	3	5	3	1	4	1	9	6	1	2	2	8	3	4	6	0	0	1	2.35	0.75323
1	2	1	4	2	2	1	1	6	1	1	3	2	3	1	6	0	0	1	2.35	0.75323
3	3	6	2	4	4	1	4	6	1	1	5	8	3	3	1	0	0	1	2.35	0.75323
1	2	3	2	3	3	2	3	5	1	3	2	11	3	5	3	0	0	1	2.35	0.75323
1	1	3	3	1	3	1	1	1	1	1	4	11	3	4	1	0	0	0	2.35	0.75323
1	3	6	5	5	2	1	9	6	1	5	5	4	3	3	4	0	1	0	2.35	0.75323
1	1	3	4	1	3	1	9	5	1	4	3	10	3	2	5	0	1	0	2.35	0.75323
1	1	1	3	4	3	3	4	6	1	1	1	8	3	4	5	0	1	0	2.35	0.75323
3	2	5	4	1	2	3	2	1	1	2	2	8	3	4	5	0	1	0	2.35	0.75323
1	1	2	4	1	2	3	2	5	2	1	1	2	3	2	4	0	1	0	2.35	0.75323
1	1	3	4	1	1	4	1	1	3	1	2	1	3	4	5	0	1	0	2.35	0.75323
1	2	1	4	1	3	3	2	3	1	1	2	1	3	3	4	0	1	0	2.35	0.75323
1	2	5	4	5	2	2	9	2	2	4	2	7	3	3	4	1	1	1	2.35	0.75323
1	2	3	4	5	2	3	1	1	3	4	2	3	3	NA	5	0	1	1	2.35	0.75323
1	2	5	3	5	3	3	4	3	1	5	2	8	3	3	4	0	1	1	2.35	0.75323
1	1	6	4	5	2	3	3	6	1	5	4	8	3	3	6	0	0	0	2.35	0.75323
1	3	4	2	1	3	1	4	4	1	1	5	8	3	3	6	0	0	0	2.35	0.75323
1	1	1	2	1	1	9	1	1	5	1	1	8	3	2	6	0	0	0	2.35	0.75323
3	3	1	4	4	3	2	2	3	1	5	5	1	3	NA	2	0	0	1	2.35	0.75323
1	1	NA	3	NA	2	3	4	1	1	NA	2	9	3	3	3	0	0	NA	2.35	0.75323
1	3	5	5	1	3	9	2	6	5	5	2	3	3	2	3	0	0	0	2.35	0.75323
1	3	5	4	1	9	9	2	6	5	5	1	3	3	2	3	0	0	1	2.35	0.75323
1	3	5	4	1	9	9	9	6	1	5	2	8	3	3	3	0	0	1	2.35	0.75323
1	3	5	3	1	9	9	9	6	1	5	2	8	3	3	3	0	0	1	2.35	0.75323
1	3	5	4	5	2	2	1	1	3	1	5	1	3	3	2	0	0	1	2.35	0.75323
1	3	5	4	5	9	9	9	6	5	5	2	3	3	2	3	0	0	1	2.35	0.75323
1	3	5	4	1	3	9	9	6	2	5	2	9	3	1	2	0	0	1	2.35	0.75323
2	3	5	2	NA	3	9	1	2	3	3	4	9	3	1	2	0	0	0	2.35	0.75323
1	3	5	3	1	9	9	1	6	5	5	3	1	3	3	4	0	0	0	2.35	0.75323
1	3	2	3	5	3	9	4	6	1	3	1	8	3	3	6	0	1	0	2.35	0.75323
1	1	2	4	1	3	9	3	5	1	2	2	3	3	2	4	0	1	1	2.35	0.75323
1	2	1	3	1	2	3	1	1	2	1	1	2	3	3	6	0	0	0	2.35	0.75323
1	NA	1	4	5	1	1	1	5	2	4	3	1	3	2	6	0	0	0	2.35	0.75323
1	2	4	3	3	2	2	1	2	3	4	4	2	3	1	2	0	0	0	2.35	0.75323
1	1	NA	4	NA	3	3	3	5	1	5	2	3	3	3	3	0	0	0	2.35	0.75323
2	NA	1	3	3	1	3	1	1	3	4	4	1	3	2	3	0	0	0	2.35	0.75323
1	3	5	4	1	4	1	2	6	1	5	5	2	3	3	3	0	0	0	2.35	0.75323
1	3	1	3	5	1	4	1	1	3	3	2	1	3	2	2	0	0	0	2.35	0.75323
1	3	5	4	3	1	4	1	6	5	1	2	1	3	4	3	0	0	1	2.35	0.75323
1	2	3	4	3	4	2	4	4	1	4	3	3	3	2	6	0	1	1	2.35	0.75323
1	1	1	2	5	1	3	4	5	1	1	3	5	3	3	6	0	1	1	2.35	0.75323
1	2	4	4	1	3	1	2	3	1	2	3	3	3	4	6	0	1	1	2.35	0.75323
1	2	5	3	1	3	1	4	5	1	2	1	1	3	3	6	0	0	1	2.35	0.75323
2	3	6	4	5	1	1	9	2	4	5	4	1	3	2	6	0	0	1	2.35	0.75323
1	NA	1	3	NA	1	1	1	5	1	1	3	1	3	2	3	0	0	0	2.35	0.75323
1	1	5	4	3	2	3	1	1	1	5	3	2	3	2	4	0	1	0	2.35	0.75323
1	3	5	4	3	3	3	3	3	1	2	4	9	3	4	3	0	1	0	2.35	0.75323
1	1	1	3	2	3	2	1	5	1	1	1	1	3	3	4	0	1	0	2.35	0.75323
2	3	5	3	5	2	1	9	6	5	5	2	8	3	2	4	0	0	0	2.35	0.75323
1	3	2	3	1	3	3	1	1	1	5	1	8	3	2	5	0	1	0	2.35	0.75323
3	1	2	5	3	2	9	3	5	1	4	2	8	3	2	5	0	0	0	2.35	0.75323
1	2	5	2	1	2	3	1	1	1	2	1	8	3	2	4	0	0	0	2.35	0.75323
1	2	6	4	5	2	9	2	4	5	5	3	8	3	2	4	0	1	0	2.35	0.75323
1	1	5	2	2	1	1	1	2	3	5	5	1	3	2	5	0	0	0	2.35	0.75323
1	1	4	4	2	9	2	4	3	1	3	4	8	3	3	4	0	0	0	2.35	0.75323
1	2	5	4	5	9	2	4	5	1	5	2	1	3	3	4	0	0	0	2.35	0.75323
1	3	5	3	5	1	1	1	5	2	2	2	1	3	NA	3	0	1	0	2.35	0.75323
1	3	5	3	5	1	NA	1	1	3	5	5	1	3	2	2	0	1	0	2.35	0.75323
1	1	1	2	1	3	1	3	3	1	1	3	10	3	2	4	0	1	0	2.35	0.75323
1	2	1	3	1	3	3	1	3	1	3	4	3	3	2	4	0	1	0	2.35	0.75323
3	1	5	1	4	9	3	1	5	1	1	3	8	3	4	4	0	1	0	2.35	0.75323
1	1	5	4	1	3	1	4	1	1	4	3	3	3	2	3	0	1	0	2.35	0.75323
1	2	2	3	3	3	3	3	5	1	5	5	8	3	4	3	0	1	0	2.35	0.75323
1	1	5	2	3	4	3	3	5	1	3	3	10	3	4	3	0	1	0	2.35	0.75323
1	1	6	3	5	2	2	9	5	1	4	5	8	3	3	5	0	1	0	2.35	0.75323
1	3	6	4	5	3	1	4	5	1	5	4	8	3	3	5	0	0	0	2.35	0.75323
1	3	6	3	5	9	2	2	5	1	2	5	8	3	3	4	0	0	0	2.35	0.75323
1	3	6	2	2	9	2	9	4	5	5	2	8	3	2	4	0	0	0	2.35	0.75323
1	3	6	4	3	4	2	9	6	5	4	5	1	3	3	3	0	0	0	2.35	0.75323
1	3	2	2	5	4	2	3	5	1	5	2	8	3	3	4	0	0	0	2.35	0.75323
1	3	4	2	5	4	2	4	5	2	4	3	8	3	3	3	0	0	0	2.35	0.75323
1	3	5	3	1	9	9	2	6	2	5	2	3	3	3	4	0	0	0	2.35	0.75323
1	3	5	4	3	3	2	3	5	1	4	4	8	3	3	3	0	0	0	2.35	0.75323
1	1	5	4	2	2	2	9	6	1	1	1	8	3	2	3	0	0	0	2.35	0.75323
3	3	1	4	5	2	2	9	6	5	1	5	2	3	3	4	0	0	0	2.35	0.75323
1	2	2	4	1	4	1	2	2	1	4	3	1	3	4	1	0	1	1	2.35	0.75323
1	2	5	3	3	9	9	3	5	2	5	3	3	3	3	1	0	1	1	2.35	0.75323
1	1	5	3	5	1	3	2	5	2	2	2	4	3	3	2	0	1	1	2.35	0.75323
1	1	5	3	5	9	9	9	6	1	2	2	8	3	2	3	0	0	1	2.35	0.75323
1	3	5	3	5	1	4	2	2	3	3	3	3	3	3	2	0	1	0	2.35	0.75323
1	3	2	3	1	3	2	9	6	1	5	5	1	3	2	2	0	1	0	2.35	0.75323
2	3	5	3	1	3	2	9	6	1	2	2	1	3	3	2	0	1	0	2.35	0.75323
1	3	5	3	5	3	2	2	2	1	4	4	1	3	2	2	0	1	0	2.35	0.75323
1	3	4	3	5	2	1	2	5	2	3	3	1	3	4	3	0	1	1	2.35	0.75323
1	1	6	4	4	3	3	3	5	1	2	3	99	3	3	2	0	1	0	2.35	0.75323
1	1	6	4	NA	2	2	4	1	5	5	2	6	3	NA	1	0	0	1	2.35	0.75323
1	1	2	3	3	3	2	3	5	2	3	5	10	3	3	5	0	0	0	2.35	0.75323
NA	3	6	3	5	1	3	2	1	3	5	1	10	3	4	5	0	0	0	2.35	0.75323
1	1	5	4	1	4	2	3	3	1	3	5	8	3	NA	3	0	0	0	2.35	0.75323
1	3	5	4	5	9	9	9	6	1	5	2	8	3	3	5	0	0	1	2.35	0.75323
1	1	5	4	1	9	9	9	6	1	5	2	8	3	2	5	0	0	1	2.35	0.75323
1	1	5	4	1	4	9	9	6	1	5	1	8	3	2	1	0	0	1	2.35	0.75323
1	2	2	4	5	2	3	4	5	1	4	3	8	3	2	5	0	1	0	2.35	0.75323
1	2	5	3	5	9	9	9	5	5	3	5	7	3	2	6	1	1	0	2.35	0.75323
1	2	6	4	3	2	3	2	2	1	5	3	8	3	3	6	0	0	0	2.35	0.75323
1	2	6	3	3	2	3	2	3	1	5	4	8	3	3	6	0	0	0	2.35	0.75323
1	1	5	4	1	2	9	3	1	1	2	2	1	3	2	2	0	1	1	2.35	0.75323
1	2	1	4	1	3	1	4	4	1	2	4	1	3	4	2	0	1	1	2.35	0.75323
3	2	6	4	1	NA	1	9	1	1	2	4	1	3	3	3	0	1	0	2.35	0.75323
1	3	6	5	5	2	1	9	6	1	5	5	4	3	NA	3	0	1	0	2.35	0.75323
1	2	5	4	3	3	3	2	5	1	2	3	1	3	3	5	0	0	0	2.35	0.75323
1	3	3	3	5	2	9	9	2	2	5	3	6	3	NA	1	0	0	0	2.35	0.75323
1	3	6	4	1	4	2	3	5	1	5	4	8	3	2	3	0	0	0	2.35	0.75323
1	1	2	4	1	2	2	2	2	2	4	3	8	3	2	2	0	1	0	2.35	0.75323
1	1	2	4	1	9	9	9	3	1	4	5	1	3	3	3	0	1	1	2.35	0.75323
1	1	5	4	3	2	2	3	5	2	4	4	4	3	4	2	0	1	1	2.35	0.75323
1	2	1	4	5	2	9	1	1	3	4	3	4	3	3	2	0	1	1	2.35	0.75323
1	2	3	4	5	3	1	2	1	2	4	3	10	3	4	1	0	1	1	2.35	0.75323
1	2	3	3	1	4	1	3	5	1	2	3	3	3	4	3	0	1	1	2.35	0.75323
1	1	5	4	5	1	3	1	4	5	2	5	2	3	4	2	0	1	1	2.35	0.75323
1	2	2	4	1	4	1	4	3	1	3	3	7	3	4	2	1	1	0	2.35	0.75323
1	3	6	2	5	1	1	4	5	1	5	4	1	3	2	5	0	0	1	2.35	0.75323
1	1	6	4	3	3	2	9	6	1	4	4	8	3	3	4	0	0	1	2.35	0.75323
1	1	6	4	2	2	1	4	6	1	4	3	8	3	3	4	0	0	1	2.35	0.75323
1	1	6	5	5	3	2	4	5	1	4	4	8	3	3	5	0	0	1	2.35	0.75323
1	3	5	4	1	9	9	2	6	2	5	5	9	3	3	4	0	0	0	2.35	0.75323
1	1	1	4	1	1	3	1	1	5	5	2	2	3	2	4	0	0	0	2.35	0.75323
1	3	6	2	1	3	2	9	5	2	5	1	2	3	3	4	0	0	0	2.35	0.75323
1	1	2	4	1	2	1	2	1	3	4	4	1	3	3	1	0	0	1	2.35	0.75323
1	3	5	4	5	9	9	9	6	1	5	2	8	3	3	1	0	0	1	2.35	0.75323
1	3	5	5	5	9	9	9	6	1	5	2	8	3	3	1	0	0	1	2.35	0.75323
1	3	5	5	5	9	NA	9	6	1	5	2	8	3	3	1	0	0	1	2.35	0.75323
1	3	5	3	5	3	9	1	6	1	5	2	9	3	3	5	0	0	1	2.35	0.75323
1	1	6	3	2	4	1	4	6	1	3	3	8	3	3	4	0	0	1	2.35	0.75323
1	3	5	5	5	3	2	4	5	1	4	4	4	3	3	4	0	1	1	2.35	0.75323
1	2	5	3	1	3	1	3	4	1	1	4	10	3	3	3	0	1	1	2.35	0.75323
1	1	1	5	5	9	9	9	5	2	5	2	1	3	4	1	0	1	1	2.35	0.75323
1	3	5	5	5	2	3	9	6	1	5	5	8	3	2	6	0	1	0	2.35	0.75323
1	1	5	3	3	1	3	2	1	5	5	3	10	3	4	2	0	1	1	2.35	0.75323
1	2	4	4	1	3	2	3	5	2	3	3	3	3	2	2	0	1	1	2.35	0.75323
1	3	1	5	1	9	1	4	3	1	2	2	8	3	3	6	0	1	0	2.35	0.75323
1	2	5	3	3	9	9	9	5	2	3	2	3	3	2	6	0	1	0	2.35	0.75323
1	3	5	4	1	2	3	1	2	1	5	1	8	3	2	6	0	1	0	2.35	0.75323
1	1	2	3	3	3	5	4	6	1	1	1	4	3	4	6	0	1	1	2.35	0.75323
1	3	5	5	5	3	2	4	5	1	4	4	4	3	3	4	0	1	1	2.35	0.75323
1	2	5	3	1	3	1	3	4	1	1	4	10	3	3	3	0	1	1	2.35	0.75323
1	2	4	4	1	2	3	3	4	1	4	4	2	3	3	4	0	1	0	2.35	0.75323
1	1	5	4	5	4	1	1	5	1	1	5	1	3	3	1	0	1	1	2.35	0.75323
1	2	6	2	3	1	NA	1	4	5	1	3	1	3	3	1	0	0	1	2.35	0.75323
1	2	2	3	5	4	1	4	5	1	1	2	8	3	3	6	0	0	0	2.35	0.75323
1	1	3	3	3	3	2	9	6	1	1	2	8	3	3	6	0	0	0	2.35	0.75323
1	1	5	4	1	3	9	2	6	1	5	2	8	3	4	6	0	0	0	2.35	0.75323
1	3	5	4	1	9	9	1	6	1	5	2	8	3	3	3	0	0	1	2.35	0.75323
1	2	5	4	1	4	2	4	5	2	3	2	8	3	2	2	0	0	1	2.35	0.75323
1	1	6	3	1	2	3	4	5	2	3	3	8	3	3	6	0	0	0	2.35	0.75323
1	3	2	4	3	3	2	2	3	1	3	2	8	3	3	3	0	1	0	2.35	0.75323
1	1	5	2	4	3	9	4	5	1	2	2	10	3	2	4	0	1	1	2.35	0.75323
1	3	6	5	NA	9	2	1	1	5	4	3	1	3	NA	6	0	0	1	2.35	0.75323
1	1	5	4	3	3	2	3	5	1	4	3	8	3	3	6	0	0	1	2.35	0.75323
1	2	6	5	3	9	9	9	2	2	5	2	3	3	2	6	0	1	1	2.35	0.75323
1	3	5	4	1	9	9	9	6	1	5	1	8	3	3	3	0	0	1	2.35	0.75323
1	3	4	3	1	2	1	4	6	1	4	2	6	3	3	2	0	0	1	2.35	0.75323
1	3	5	4	1	3	2	9	6	1	1	1	8	3	2	3	0	0	1	2.35	0.75323
1	1	5	3	1	1	4	1	1	2	5	2	2	3	4	3	0	0	1	2.35	0.75323
1	3	5	5	3	2	1	1	1	3	5	3	1	3	2	3	0	0	1	2.35	0.75323
1	3	6	1	5	2	1	9	6	1	5	5	4	3	3	6	0	1	0	2.35	0.75323
1	3	3	3	1	3	9	1	2	5	5	2	1	3	3	1	0	0	1	2.35	0.75323
3	3	6	4	5	3	1	9	1	1	5	1	1	3	3	4	0	0	1	2.35	0.75323
1	1	6	3	5	3	2	4	5	1	4	4	1	3	2	4	0	0	0	2.35	0.75323
1	3	4	3	2	3	2	3	4	1	3	3	8	3	3	4	0	0	0	2.35	0.75323
1	1	4	4	1	3	2	9	5	1	3	3	8	3	3	6	0	0	1	2.35	0.75323
1	2	1	4	2	3	2	2	3	1	3	4	12	3	2	3	0	1	1	2.35	0.75323
1	1	5	3	1	4	1	9	6	5	5	2	6	3	3	2	0	1	1	2.35	0.75323
1	2	5	3	5	9	9	9	3	1	5	2	1	3	3	3	0	1	1	2.35	0.75323
1	2	3	3	2	2	1	9	1	1	1	3	2	3	2	3	0	1	1	2.35	0.75323
1	1	5	4	1	2	1	1	1	1	1	3	1	3	3	2	0	1	1	2.35	0.75323
1	1	2	3	5	2	3	3	5	1	2	3	5	3	3	6	0	1	0	2.35	0.75323
1	3	5	2	1	2	3	2	2	2	4	2	3	4	3	2	0	0	1	0	1.01417
1	2	5	2	5	3	2	3	5	2	4	4	5	4	3	2	0	0	0	0	1.01417
1	1	5	4	5	2	2	1	1	1	1	2	1	4	2	4	1	0	1	0	1.01417
1	1	4	3	2	3	2	3	6	5	4	4	4	4	3	2	0	0	0	0	1.01417
1	2	4	3	2	1	9	1	6	1	4	4	1	4	3	6	1	0	0	0	1.01417
1	1	2	4	1	2	3	1	4	1	1	4	1	4	2	6	1	0	0	0	1.01417
1	1	1	4	1	1	3	2	1	1	1	3	2	4	2	3	0	0	0	0	1.01417
1	2	4	3	3	1	2	1	4	1	4	3	1	4	3	4	1	0	1	0	1.01417
1	3	5	3	3	2	2	3	5	2	4	3	3	4	2	3	0	0	1	0	1.01417
1	3	2	3	1	9	9	3	5	1	5	4	2	4	NA	1	0	0	1	0	1.01417
2	2	4	4	3	2	2	1	4	1	3	4	1	4	4	3	1	0	0	0	1.01417
1	1	5	4	5	3	1	4	5	1	4	4	1	4	2	3	1	0	0	0	1.01417
1	3	2	3	5	9	1	3	5	1	2	4	1	4	3	4	1	0	1	0	1.01417
2	1	5	4	1	2	3	2	2	1	4	1	2	4	2	6	0	0	1	0	1.01417
2	2	5	2	1	3	9	2	2	1	4	3	1	4	2	6	1	0	0	0	1.01417
2	2	1	3	3	1	4	2	1	3	4	3	3	4	3	6	0	0	0	0	1.01417
1	3	5	1	3	2	2	3	5	5	1	2	3	4	NA	6	0	0	1	0	1.01417
1	3	2	3	2	2	2	3	5	5	4	4	1	4	4	4	1	0	0	0	1.01417
2	2	5	2	1	3	1	2	4	5	5	3	3	4	2	5	0	0	0	0	1.01417
1	1	2	2	5	3	1	2	6	3	3	4	3	4	3	5	0	0	1	0	1.01417
1	2	5	3	5	2	2	2	5	2	4	2	1	4	4	4	1	1	0	0	1.01417
2	3	5	4	5	3	1	9	6	5	4	3	3	4	1	6	0	0	1	0	1.01417
2	2	3	3	4	3	1	3	5	2	3	4	3	4	3	5	0	0	0	0	1.01417
1	2	2	3	1	3	1	3	6	1	1	4	3	4	3	3	0	0	1	0	1.01417
1	3	2	3	3	2	2	3	5	5	2	4	3	4	3	5	0	0	1	0	1.01417
2	3	3	2	4	3	9	9	6	2	1	3	3	4	2	1	0	0	1	0	1.01417
2	3	3	2	3	3	9	3	5	5	3	4	3	4	3	2	0	0	0	0	1.01417
1	2	6	3	3	3	9	3	5	2	5	5	3	4	2	5	0	0	1	0	1.01417
2	2	1	2	3	3	9	9	6	5	3	4	3	4	3	1	0	0	1	0	1.01417
1	3	5	3	3	2	1	4	3	1	4	4	3	4	5	4	0	0	0	0	1.01417
1	3	3	1	4	3	2	3	6	5	5	2	3	4	4	1	0	0	0	0	1.01417
1	3	4	2	5	3	2	2	6	5	5	4	3	4	4	1	0	0	0	0	1.01417
2	1	1	3	2	3	3	3	5	2	3	4	3	4	3	4	0	0	0	0	1.01417
2	3	4	3	1	2	2	2	5	1	2	3	1	4	4	5	1	0	0	0	1.01417
2	2	4	4	2	1	4	1	4	1	2	3	3	4	4	6	0	0	0	0	1.01417
2	2	4	4	3	9	9	2	4	1	3	3	1	4	5	5	1	0	0	0	1.01417
1	2	4	3	3	1	2	1	4	1	4	3	1	4	3	6	1	0	1	0	1.01417
1	2	4	3	3	1	2	1	4	1	4	4	1	4	3	4	1	0	1	0	1.01417
1	2	3	4	5	3	1	3	6	5	2	2	1	4	NA	3	1	0	1	0	1.01417
1	3	1	4	5	4	2	3	2	5	4	4	1	4	5	6	1	0	1	0	1.01417
1	3	3	3	1	3	1	9	5	1	5	3	3	4	4	1	0	0	0	0	1.01417
3	1	5	3	1	3	9	9	6	5	2	4	3	4	4	2	0	0	1	0	1.01417
1	1	5	3	5	3	1	3	5	4	4	4	3	4	2	5	0	0	1	0	1.01417
2	3	2	5	5	1	4	2	5	1	4	4	3	4	3	6	0	0	0	0	1.01417
2	1	1	5	3	3	1	3	6	5	1	3	3	4	3	4	0	0	0	0	1.01417
1	2	4	3	2	NA	2	1	5	1	4	4	1	4	3	6	1	0	1	0	1.01417
1	1	4	1	3	3	1	2	2	1	3	2	3	4	3	1	0	0	0	0	1.01417
2	3	2	1	1	3	9	4	5	1	2	4	3	4	4	3	0	0	1	0	1.01417
1	2	4	3	5	3	9	2	5	1	4	3	1	4	4	1	1	0	0	0	1.01417
1	2	3	3	5	3	2	3	5	2	3	3	1	4	2	4	1	0	1	0	1.01417
1	1	4	3	1	3	2	4	5	2	4	3	3	4	2	6	0	0	0	0	1.01417
1	2	1	3	1	2	2	3	1	1	4	1	99	4	2	3	0	0	1	0	1.01417
1	2	3	3	1	2	2	3	3	2	3	2	1	4	4	3	1	0	0	0	1.01417
2	1	3	4	1	2	2	2	5	2	4	3	1	4	2	6	1	0	0	0	1.01417
1	1	3	4	1	3	1	3	3	2	3	3	1	4	2	2	1	0	1	0	1.01417
1	1	4	3	1	4	1	4	6	2	1	2	1	4	3	1	1	0	1	0	1.01417
1	1	3	4	1	1	1	3	6	1	1	4	1	4	5	4	1	0	1	0	1.01417
NA	3	NA	3	1	3	3	9	2	1	3	4	1	4	2	4	1	0	0	0	1.01417
1	2	2	3	3	2	2	3	5	2	3	2	3	4	3	3	0	0	0	0	1.01417
1	2	1	3	3	1	3	2	3	3	3	3	3	4	3	6	0	0	1	0	1.01417
1	2	2	2	2	2	2	3	5	5	2	3	3	4	3	2	0	0	1	0	1.01417
1	1	1	3	3	3	1	3	5	2	2	3	1	4	4	4	1	0	1	0	1.01417
1	2	5	3	5	3	1	2	5	2	2	2	3	4	3	4	0	0	1	0	1.01417
1	2	5	4	2	2	3	2	5	5	4	2	3	4	4	3	0	0	0	0	1.01417
1	3	5	2	2	1	3	1	4	5	3	2	3	4	2	3	0	0	1	0	1.01417
1	2	5	2	4	2	3	3	5	1	2	3	3	4	3	6	0	0	0	0	1.01417
1	1	5	2	3	1	3	3	3	1	3	3	3	4	3	6	0	0	1	0	1.01417
1	2	5	4	1	9	1	1	6	5	1	5	1	4	NA	6	1	0	1	0	1.01417
1	2	5	3	5	3	9	2	1	5	3	3	3	4	1	3	0	0	1	0	1.01417
1	1	2	1	1	3	3	4	5	1	3	1	1	4	4	6	1	0	1	0	1.01417
1	1	3	2	3	1	3	3	4	5	3	2	3	4	3	6	0	0	0	0	1.01417
1	2	4	2	1	2	2	3	5	1	4	3	5	4	2	2	0	1	1	0	1.01417
2	3	1	2	2	3	9	4	6	2	1	4	3	4	3	3	0	0	0	0	1.01417
2	1	5	4	1	2	1	3	3	2	2	2	1	4	3	2	1	0	0	0	1.01417
1	1	2	3	1	2	2	9	4	5	4	3	1	4	4	1	1	0	1	0	1.01417
1	1	3	4	5	2	2	3	5	5	3	2	1	4	2	4	1	0	0	0	1.01417
2	1	3	4	1	1	2	1	1	1	4	1	1	4	2	6	1	0	1	0	1.01417
1	1	3	4	1	2	2	4	4	1	3	2	1	4	2	1	1	0	1	0	1.01417
1	1	5	3	1	3	1	9	5	5	3	2	1	4	3	3	1	0	0	0	1.01417
1	3	5	5	5	9	2	4	5	1	1	5	1	4	NA	5	1	0	1	0	1.01417
1	1	3	3	1	2	3	3	3	1	2	2	6	4	2	2	0	0	0	0	1.01417
1	1	5	4	1	2	2	2	3	2	3	2	1	4	4	2	1	0	0	0	1.01417
1	2	3	3	3	3	9	9	6	2	2	3	1	4	4	2	1	0	0	0	1.01417
1	2	3	3	2	4	1	3	5	1	2	3	1	4	3	1	1	0	0	0	1.01417
1	2	3	2	2	4	9	9	5	1	2	3	1	4	3	1	1	0	1	0	1.01417
2	2	1	3	3	1	2	2	1	1	1	3	3	4	3	6	0	0	0	0	1.01417
1	1	5	4	3	2	2	1	1	5	2	2	3	4	3	5	0	0	0	0	1.01417
2	1	4	1	1	3	1	3	5	1	4	3	1	4	3	6	1	0	0	0	1.01417
1	1	3	4	1	2	3	3	3	2	3	2	1	4	3	1	1	0	0	0	1.01417
1	2	5	3	1	3	1	4	5	5	4	3	1	4	3	1	1	0	0	0	1.01417
2	1	5	4	1	4	1	1	1	5	5	3	1	4	2	5	1	0	1	0	1.01417
1	1	3	3	1	2	2	4	5	2	4	3	1	4	NA	4	1	0	0	0	1.01417
2	1	2	2	4	4	2	4	6	2	1	3	1	4	3	1	1	0	1	0	1.01417
1	3	5	3	4	1	3	2	5	1	1	3	3	4	3	2	0	0	1	0	1.01417
1	1	4	3	1	3	2	3	5	1	2	2	1	4	2	1	1	0	0	0	1.01417
1	1	4	3	1	3	1	3	5	1	2	2	1	4	3	5	1	0	1	0	1.01417
1	2	1	1	3	2	2	2	5	2	3	3	3	4	3	3	0	0	1	0	1.01417
2	1	5	5	3	2	3	1	5	1	3	2	1	4	3	4	1	0	1	0	1.01417
1	1	5	4	2	1	3	1	5	1	4	3	1	4	3	6	1	0	0	0	1.01417
1	1	5	3	1	2	1	2	5	1	1	3	1	4	2	3	1	0	0	0	1.01417
1	1	2	2	2	2	2	2	4	2	2	2	1	4	3	6	1	0	1	0	1.01417
1	1	6	4	2	1	3	4	1	2	2	2	1	4	3	6	1	0	1	0	1.01417
1	1	1	3	3	2	3	2	5	1	3	2	7	4	3	4	0	0	1	0	1.01417
1	1	1	2	3	2	1	1	5	1	4	3	1	4	3	6	1	0	0	0	1.01417
1	1	4	2	1	2	2	4	5	2	4	3	3	4	3	4	0	0	0	0	1.01417
1	1	3	2	1	3	2	4	5	2	4	3	1	4	2	4	1	0	1	0	1.01417
1	1	2	3	1	3	2	4	5	2	4	3	5	4	2	3	0	0	1	0	1.01417
2	1	3	3	1	2	4	4	5	5	4	3	1	4	3	2	1	0	0	0	1.01417
2	1	2	3	4	3	2	4	5	1	3	3	1	4	2	6	1	0	1	0	1.01417
1	1	5	1	3	3	2	2	5	1	1	1	3	4	5	6	0	0	0	0	1.01417
1	1	2	1	2	2	2	2	3	5	3	3	3	4	2	1	0	0	1	0	1.01417
1	1	3	NA	1	3	2	4	5	2	4	3	1	4	4	2	1	0	1	0	1.01417
2	1	1	1	1	1	1	1	1	1	1	1	1	4	4	6	1	0	0	0	1.01417
1	2	5	4	1	3	3	4	5	1	2	2	3	4	3	4	0	0	1	0	1.01417
1	1	5	4	1	4	1	2	5	1	1	3	5	4	2	6	0	0	1	0	1.01417
1	1	5	4	1	2	3	2	5	1	1	2	9	4	2	5	0	0	0	0	1.01417
1	2	5	3	1	2	3	3	5	2	2	2	10	4	3	6	0	0	0	0	1.01417
2	1	5	2	2	1	4	1	5	1	2	2	1	4	2	6	1	0	0	0	1.01417
NA	3	5	4	1	2	3	1	1	1	1	4	1	4	4	4	1	0	0	0	1.01417
1	1	3	4	4	2	1	3	5	1	2	2	1	4	4	4	1	0	1	0	1.01417
1	3	5	2	1	3	1	3	6	1	2	2	1	4	4	1	1	0	1	0	1.01417
1	3	4	3	3	1	2	3	5	1	2	3	1	4	3	6	1	0	0	0	1.01417
1	2	3	4	1	2	1	3	4	1	3	2	1	4	3	4	1	0	0	0	1.01417
1	2	3	4	1	2	1	3	4	1	3	2	1	4	3	4	1	0	0	0	1.01417
1	1	3	4	5	3	2	4	2	1	2	2	1	4	1	6	1	0	0	0	1.01417
1	1	4	4	1	1	3	2	2	1	1	2	1	4	2	4	1	0	0	0	1.01417
1	2	1	3	3	2	1	4	5	2	4	5	3	4	4	6	0	0	0	0	1.01417
1	1	5	2	3	2	9	1	5	2	2	3	1	4	3	6	1	0	0	0	1.01417
1	1	5	4	3	3	4	3	2	2	5	3	8	4	3	3	0	0	1	0	1.01417
1	1	5	4	1	2	9	3	5	2	2	3	4	4	3	3	0	0	1	0	1.01417
1	1	1	2	3	3	2	1	5	1	1	1	1	4	3	4	1	1	0	0	1.01417
1	2	3	3	1	2	2	3	2	2	3	3	1	4	3	5	1	1	0	0	1.01417
1	1	2	4	1	3	9	1	5	1	2	3	1	4	4	3	1	1	1	0	1.01417
1	2	4	4	1	3	1	3	5	1	2	2	1	4	3	3	1	1	0	0	1.01417
1	1	1	4	1	1	1	1	3	5	5	1	99	4	2	6	0	1	1	0	1.01417
1	1	5	4	1	2	3	1	4	5	4	1	3	4	3	5	0	0	1	0	1.01417
1	1	5	3	2	3	2	4	5	5	2	2	3	4	3	1	0	0	1	0	1.01417
1	1	4	3	1	3	4	4	5	5	5	3	1	4	3	2	1	0	0	0	1.01417
1	2	4	3	3	3	2	3	5	5	2	3	3	4	4	5	0	0	0	0	1.01417
1	2	5	4	1	1	4	1	3	1	1	1	2	4	2	6	0	0	0	0	1.01417
1	2	5	3	2	1	9	1	1	3	2	3	3	4	2	6	0	0	0	0	1.01417
2	1	4	4	3	2	9	1	6	5	2	2	1	4	3	3	1	0	0	0	1.01417
1	3	2	2	2	9	9	2	2	2	3	3	1	4	2	3	1	1	1	0	1.01417
1	3	5	3	5	3	3	9	5	1	3	2	1	4	NA	4	1	1	0	0	1.01417
1	2	5	5	5	2	2	4	3	1	5	2	1	4	3	1	1	1	0	0	1.01417
1	2	3	2	4	3	3	2	1	1	3	2	5	4	4	2	0	1	0	0	1.01417
2	1	2	2	2	2	2	2	5	1	2	2	3	4	2	5	0	1	1	0	1.01417
1	2	5	2	4	2	3	1	3	1	3	3	3	4	3	5	0	1	1	0	1.01417
3	1	2	4	3	3	1	1	3	5	3	4	1	4	1	2	1	1	1	0	1.01417
1	1	4	4	1	1	9	1	1	1	3	4	1	4	4	5	1	1	1	0	1.01417
1	1	5	4	1	3	3	2	3	1	3	3	1	4	2	2	1	1	0	0	1.01417
1	2	5	2	1	3	2	2	5	5	3	2	1	4	3	6	1	1	0	0	1.01417
1	1	3	2	1	NA	NA	4	5	1	2	2	3	4	4	1	0	1	0	0	1.01417
1	2	5	2	4	9	2	1	1	1	1	2	1	4	3	4	1	1	1	0	1.01417
1	2	1	5	5	3	3	4	5	1	5	1	1	4	1	3	1	1	1	0	1.01417
1	2	1	2	4	1	9	1	5	1	1	3	2	4	2	6	0	1	0	0	1.01417
1	2	1	5	2	NA	2	4	5	1	3	3	3	4	4	3	0	1	1	0	1.01417
1	1	5	4	1	4	9	1	1	1	4	1	1	4	3	3	1	1	1	0	1.01417
1	3	2	3	5	3	2	2	1	1	5	3	1	4	2	4	1	1	0	0	1.01417
1	2	5	4	3	3	9	3	5	1	3	4	3	4	3	1	0	1	0	0	1.01417
1	2	4	5	1	4	3	1	6	5	1	4	1	4	2	6	1	1	0	0	1.01417
1	2	1	1	1	9	9	2	1	1	2	1	1	4	3	3	1	1	0	0	1.01417
1	3	1	3	5	2	3	1	3	1	5	5	1	4	2	5	1	1	0	0	1.01417
1	2	5	3	5	1	4	1	1	4	1	3	1	4	2	6	1	0	0	0	1.01417
1	1	5	2	2	2	1	2	4	2	2	3	1	4	3	5	1	0	1	0	1.01417
1	1	2	4	1	2	2	1	5	1	1	3	1	4	5	6	1	0	0	0	1.01417
1	1	4	4	1	4	1	1	5	1	3	4	1	4	3	5	1	1	1	0	1.01417
1	2	2	3	2	2	2	4	5	1	4	3	3	4	2	2	0	1	1	0	1.01417
1	1	3	3	1	4	2	4	5	1	2	3	1	4	3	4	1	1	0	0	1.01417
1	1	5	2	1	1	9	1	5	1	1	2	1	4	3	5	1	0	0	0	1.01417
1	1	3	2	4	1	3	1	5	1	1	2	1	4	2	6	1	0	0	0	1.01417
1	1	5	2	3	2	3	2	3	2	2	3	1	4	3	6	1	1	0	0	1.01417
1	1	4	4	4	3	1	2	5	2	5	3	1	4	2	2	1	1	0	0	1.01417
1	2	5	2	1	2	9	4	5	1	4	3	1	4	3	3	1	1	1	0	1.01417
1	2	1	3	1	2	2	4	5	2	3	1	1	4	4	3	1	1	1	0	1.01417
1	3	5	3	1	3	2	1	6	5	1	2	1	4	4	2	1	1	0	0	1.01417
1	1	5	3	3	2	3	1	3	1	5	3	1	4	4	6	1	1	0	0	1.01417
1	1	1	4	1	4	1	4	5	1	2	4	2	4	2	5	0	1	1	0	1.01417
1	3	6	3	1	2	3	2	6	1	2	2	2	4	3	6	0	1	1	0	1.01417
3	3	5	3	1	9	2	9	2	2	5	5	11	4	3	5	0	1	0	0	1.01417
1	3	5	2	2	2	2	2	5	5	1	3	1	4	3	5	1	1	1	0	1.01417
1	2	2	3	2	1	1	3	5	1	1	3	3	4	5	2	0	1	1	0	1.01417
1	2	3	3	3	3	1	2	5	2	3	2	98	4	4	4	0	1	0	0	1.01417
1	1	5	3	5	9	1	2	5	2	3	5	6	4	2	3	0	1	0	0	1.01417
2	2	4	3	3	3	1	1	5	1	2	2	1	4	2	6	1	1	0	0	1.01417
1	3	1	2	3	2	3	2	2	1	3	4	1	4	4	4	1	1	0	0	1.01417
1	2	2	3	1	3	1	2	5	1	5	2	1	4	4	5	1	1	1	0	1.01417
1	2	2	2	4	3	2	3	5	1	2	4	1	4	3	5	1	0	1	0	1.01417
1	2	3	3	1	2	2	1	2	1	3	3	8	4	3	4	0	0	0	0	1.01417
1	1	3	3	1	2	3	2	2	1	3	3	8	4	3	3	0	0	0	0	1.01417
1	1	2	3	1	3	1	3	5	1	3	3	1	4	3	1	1	0	1	0	1.01417
1	3	4	2	5	3	3	2	6	5	5	4	1	4	2	5	1	1	0	0	1.01417
NA	1	1	5	3	3	3	3	6	1	2	3	1	4	3	3	1	0	1	0	1.01417
1	2	5	4	1	2	2	2	5	1	1	2	1	4	3	6	1	1	0	0	1.01417
1	2	2	3	5	3	2	2	6	3	5	2	1	4	5	1	1	1	0	0	1.01417
1	2	5	3	1	2	4	2	5	1	1	1	1	4	3	3	1	1	0	0	1.01417
1	1	6	3	1	9	9	3	5	1	2	2	1	4	4	5	1	1	0	0	1.01417
1	3	5	3	5	4	1	9	5	1	5	3	12	4	4	4	0	1	1	0	1.01417
1	3	5	1	3	3	1	3	3	1	1	2	3	4	3	1	0	1	0	0	1.01417
1	NA	3	3	3	1	1	1	6	1	1	3	3	4	3	4	0	1	0	0	1.01417
1	1	3	2	3	3	2	2	2	2	3	2	3	4	4	4	0	1	0	0	1.01417
1	3	5	2	2	3	2	9	5	2	1	3	3	4	2	6	0	1	0	0	1.01417
1	3	6	5	3	2	1	3	6	2	5	3	3	4	2	3	0	1	0	0	1.01417
1	3	6	5	5	1	3	1	6	5	3	5	3	4	2	2	0	1	0	0	1.01417
NA	1	1	3	2	3	3	3	5	2	3	4	3	4	5	2	0	1	1	0	1.01417
NA	2	1	5	1	4	1	4	5	1	3	2	1	4	2	6	1	1	1	0	1.01417
1	2	1	5	1	1	4	4	5	1	2	NA	1	4	1	6	1	1	0	0	1.01417
1	2	1	2	3	2	9	4	5	1	2	3	2	4	3	6	0	1	1	0	1.01417
1	2	5	3	3	3	1	3	NA	1	3	1	3	4	NA	4	0	1	0	0	1.01417
1	2	5	1	2	2	9	2	5	1	3	1	5	4	4	2	0	1	1	0	1.01417
1	1	5	3	4	2	2	3	4	1	2	3	1	4	3	5	1	1	0	0	1.01417
2	1	2	2	2	4	1	4	5	2	5	1	1	4	5	6	1	1	0	0	1.01417
1	3	4	1	1	3	2	4	5	2	5	3	1	4	5	1	1	1	0	0	1.01417
2	1	2	2	2	2	2	2	5	1	2	1	1	4	2	2	1	1	0	0	1.01417
1	2	3	2	3	3	2	2	5	1	3	3	1	4	3	2	1	0	0	0	1.01417
1	2	5	2	5	2	9	3	5	1	4	3	1	4	3	5	1	1	1	0	1.01417
1	3	1	2	3	2	3	2	2	1	3	4	1	4	4	6	1	1	1	0	1.01417
1	1	3	3	1	2	3	3	5	1	5	2	1	4	2	3	1	1	0	0	1.01417
1	3	5	3	3	3	2	4	5	1	4	3	3	4	4	4	0	1	1	0	1.01417
1	2	5	3	1	2	3	3	5	1	1	2	3	4	4	3	0	1	1	0	1.01417
1	2	4	2	3	3	1	4	NA	1	2	4	1	4	4	4	1	1	0	0	1.01417
2	1	3	2	1	2	3	3	5	1	2	3	1	4	4	6	1	1	0	0	1.01417
1	2	1	2	3	2	2	4	5	1	4	3	3	4	4	2	0	1	1	0	1.01417
1	2	5	3	1	2	1	3	4	1	2	3	1	4	4	4	1	1	0	0	1.01417
2	1	2	2	2	2	3	2	5	2	2	2	1	4	4	4	1	1	1	0	1.01417
1	1	1	3	1	9	1	4	5	5	4	3	1	4	3	3	1	1	0	0	1.01417
1	2	5	1	5	4	1	4	5	1	4	3	3	4	2	2	0	1	0	0	1.01417
1	2	3	4	3	2	2	9	5	1	4	2	1	4	2	3	1	1	0	0	1.01417
1	1	1	4	1	4	2	4	5	1	5	4	1	4	2	4	1	1	1	0	1.01417
1	3	4	5	5	9	9	3	6	5	5	2	1	4	2	5	1	1	0	0	1.01417
1	3	5	4	1	3	3	4	3	1	2	1	1	4	2	5	1	1	0	0	1.01417
1	2	1	2	1	2	9	9	6	1	2	1	1	4	2	3	1	1	1	0	1.01417
2	1	3	3	3	2	2	4	5	1	2	2	1	4	2	4	1	1	1	0	1.01417
1	3	6	4	3	1	3	1	1	NA	4	3	3	4	2	5	0	1	1	0	1.01417
1	2	5	1	1	2	3	1	1	1	4	3	1	4	4	6	1	1	1	0	1.01417
1	3	6	3	1	2	2	2	1	2	5	2	1	4	3	1	1	1	0	0	1.01417
1	1	3	2	1	2	2	3	5	1	1	3	1	4	4	6	1	1	1	0	1.01417
1	1	2	4	1	3	3	4	5	1	2	3	2	4	3	4	0	1	0	0	1.01417
1	1	3	2	1	2	3	3	5	1	2	2	1	4	2	3	1	1	0	0	1.01417
1	2	4	4	1	2	3	4	5	1	4	3	3	4	2	5	0	1	1	0	1.01417
2	1	3	2	1	2	3	3	5	1	2	2	1	4	4	1	1	1	1	0	1.01417
1	1	5	3	1	2	3	2	1	1	2	2	1	4	3	4	1	1	0	0	1.01417
1	2	5	2	1	3	9	9	2	1	2	3	5	4	5	6	0	1	1	0	1.01417
1	1	2	4	1	4	2	4	4	1	3	3	1	4	3	1	1	1	1	0	1.01417
1	1	1	4	1	3	1	3	5	1	2	4	1	4	2	6	1	1	1	0	1.01417
2	1	6	1	4	2	2	3	5	1	2	2	1	4	4	2	1	1	1	0	1.01417
1	2	5	3	5	3	2	3	5	1	4	3	1	4	NA	4	1	1	1	0	1.01417
1	2	2	2	5	2	4	1	1	2	4	2	3	4	4	2	0	1	1	0	1.01417
1	1	3	3	2	2	2	2	5	1	2	1	1	4	2	1	1	1	0	0	1.01417
1	1	5	3	1	3	2	2	1	NA	3	2	1	4	3	4	1	1	0	0	1.01417
1	1	5	2	1	1	4	1	2	2	5	3	1	4	2	6	1	1	1	0	1.01417
1	2	3	2	3	2	2	4	1	1	1	3	1	4	3	3	1	1	0	0	1.01417
1	1	5	2	5	3	2	4	4	1	2	2	3	4	4	2	0	1	0	0	1.01417
1	2	5	3	3	1	3	4	5	1	3	3	1	4	2	6	1	1	0	0	1.01417
1	2	1	2	3	9	9	4	5	1	1	3	1	4	3	6	1	1	0	0	1.01417
1	2	5	2	4	3	2	1	5	1	2	3	1	4	4	4	1	1	0	0	1.01417
2	2	3	3	1	1	1	1	3	1	3	3	1	4	3	5	1	1	0	0	1.01417
1	2	5	1	4	2	3	1	1	NA	1	1	5	4	4	2	0	1	1	0	1.01417
1	2	2	3	1	2	2	3	3	1	4	3	1	4	4	4	1	1	1	0	1.01417
2	1	5	2	3	2	2	3	5	1	2	2	1	4	4	3	1	1	1	0	1.01417
1	1	4	3	1	4	1	4	3	1	3	2	1	4	3	3	1	1	0	0	1.01417
1	3	5	2	3	3	1	3	6	1	4	2	1	4	4	4	1	1	1	0	1.01417
1	3	4	2	5	3	2	2	6	5	5	NA	1	4	4	6	1	1	1	0	1.01417
1	1	3	3	1	1	3	1	3	1	3	3	1	4	3	6	1	0	0	0	1.01417
1	2	5	4	1	3	1	3	5	1	1	3	1	4	3	3	1	0	1	0	1.01417
1	2	2	3	1	3	1	3	6	1	1	4	1	4	3	3	1	1	1	0	1.01417
1	1	3	3	1	3	4	1	1	3	4	2	1	4	3	2	1	0	1	0	1.01417
1	1	3	5	1	1	3	3	5	1	5	3	4	4	2	6	0	1	0	0	1.01417
1	2	1	4	1	1	1	1	1	1	1	1	2	4	4	5	0	1	1	0	1.01417
1	1	5	3	1	2	3	3	5	1	2	2	1	4	5	6	1	1	0	0	1.01417
1	1	3	2	3	3	3	1	3	1	2	2	1	4	2	6	1	1	0	0	1.01417
2	3	2	5	5	1	4	2	5	1	4	4	1	4	3	1	1	1	1	0	1.01417
2	1	1	3	2	2	3	3	5	2	1	4	1	4	3	2	1	1	1	0	1.01417
1	1	2	4	5	2	2	9	1	1	2	1	1	4	3	6	1	1	0	0	1.01417
1	1	2	3	4	3	2	2	3	1	2	2	1	4	3	1	1	1	0	0	1.01417
1	3	6	2	4	2	2	3	3	1	3	2	1	4	3	3	1	1	0	0	1.01417
1	3	5	2	5	2	2	2	6	1	3	2	3	4	4	2	0	1	0	0	1.01417
1	1	3	3	5	2	2	3	5	1	3	2	1	4	3	4	1	1	0	0	1.01417
1	3	5	2	3	4	1	4	5	2	5	2	99	4	3	4	0	1	0	0	1.01417
1	2	4	3	3	2	3	3	5	1	1	3	3	4	4	3	0	1	0	0	1.01417
1	3	5	2	2	2	3	9	5	1	1	3	3	4	3	6	0	1	0	0	1.01417
1	3	5	1	2	2	2	3	5	2	1	2	3	4	3	6	0	1	0	0	1.01417
1	3	1	3	5	3	1	2	3	1	5	3	3	4	1	4	0	1	0	0	1.01417
1	1	2	4	3	3	2	4	6	1	2	2	3	4	2	2	0	1	0	0	1.01417
1	2	3	3	3	2	2	2	NA	1	3	2	3	4	3	2	0	1	0	0	1.01417
1	3	5	2	3	3	1	3	6	1	1	2	3	4	4	1	0	1	1	0	1.01417
1	2	2	3	5	3	2	3	5	1	4	4	1	4	2	3	1	1	1	0	1.01417
1	3	5	2	3	3	2	9	5	2	1	2	1	4	3	5	1	1	1	0	1.01417
2	3	5	1	3	2	3	9	5	2	5	3	99	4	2	4	0	1	1	0	1.01417
1	3	6	3	3	9	9	9	6	5	2	3	3	4	2	4	0	1	0	0	1.01417
1	2	3	3	5	2	2	3	5	5	3	3	1	4	3	3	1	1	0	0	1.01417
1	3	2	2	2	2	3	4	5	1	2	3	3	4	2	6	0	1	1	0	1.01417
1	1	5	2	2	9	9	2	5	1	3	1	5	4	3	6	0	1	0	0	1.01417
1	2	3	2	1	2	3	1	1	5	3	1	5	4	2	2	0	1	0	0	1.01417
1	1	3	2	3	3	2	3	5	1	2	2	1	4	4	6	1	1	0	0	1.01417
1	2	5	5	5	2	9	4	5	5	3	3	3	4	3	6	0	1	0	0	1.01417
1	1	3	4	1	2	3	1	5	1	3	3	1	4	3	3	1	0	1	0	1.01417
1	1	4	3	1	2	3	3	5	1	2	4	1	4	3	6	1	1	0	0	1.01417
3	1	5	4	1	1	9	1	1	4	4	2	1	5	3	6	0	0	0	4.03	0.94216
2	2	3	3	1	1	4	2	1	3	2	4	1	5	2	6	0	1	1	4.03	0.94216
2	3	1	4	2	1	9	1	1	1	1	3	1	5	4	1	0	1	1	4.03	0.94216
2	3	3	2	1	1	4	1	1	5	1	2	1	5	2	3	0	0	0	4.03	0.94216
1	1	3	4	4	2	3	1	1	3	3	3	1	5	3	3	0	0	1	4.03	0.94216
1	2	5	4	4	3	2	1	1	2	4	2	1	5	4	3	0	1	1	4.03	0.94216
2	3	2	2	2	1	2	2	1	5	5	3	2	5	4	3	0	0	0	4.03	0.94216
1	2	3	3	3	1	3	2	1	5	2	4	2	5	3	3	0	0	1	4.03	0.94216
2	1	3	2	2	1	2	2	1	5	2	3	1	5	5	5	0	0	0	4.03	0.94216
2	2	1	3	2	1	4	1	1	3	3	3	1	5	2	4	0	1	1	4.03	0.94216
1	2	2	3	2	2	1	3	2	5	2	5	1	5	3	4	0	0	0	4.03	0.94216
2	3	1	2	5	1	2	4	1	5	3	3	1	5	NA	3	0	0	1	4.03	0.94216
1	3	2	3	5	3	3	4	6	2	5	1	1	5	4	4	0	0	0	4.03	0.94216
2	1	3	2	1	1	4	2	1	5	2	3	1	5	3	3	0	0	0	4.03	0.94216
2	2	5	4	3	1	2	2	1	5	4	3	1	5	4	1	0	0	0	4.03	0.94216
1	3	2	3	3	2	2	2	5	2	4	1	1	5	2	2	0	0	0	4.03	0.94216
2	2	3	2	2	1	9	1	1	5	2	2	1	5	2	2	0	0	1	4.03	0.94216
1	3	5	3	3	2	9	1	1	4	4	4	2	5	4	4	0	1	0	4.03	0.94216
3	3	5	5	3	2	9	1	1	4	4	4	2	5	NA	3	0	1	0	4.03	0.94216
1	2	3	4	3	1	2	1	1	1	4	4	1	5	4	2	0	0	1	4.03	0.94216
1	3	5	4	3	1	3	1	1	3	5	4	1	5	3	3	0	0	0	4.03	0.94216
2	2	3	2	3	1	9	1	1	3	4	3	2	5	4	3	0	0	0	4.03	0.94216
1	2	3	4	1	1	1	1	1	3	4	3	1	5	5	5	0	0	0	4.03	0.94216
1	3	5	2	5	1	2	9	1	5	2	5	2	5	2	2	0	1	1	4.03	0.94216
2	2	1	3	3	3	1	9	6	5	4	2	1	5	3	2	0	1	0	4.03	0.94216
2	3	1	2	5	1	2	4	1	5	3	3	1	5	NA	3	0	0	1	4.03	0.94216
1	3	5	2	5	2	1	3	6	2	1	2	1	5	3	6	0	1	1	4.03	0.94216
1	2	4	4	1	2	1	1	1	3	4	2	1	5	1	5	0	0	1	4.03	0.94216
1	3	6	2	2	3	2	2	2	2	1	3	1	5	4	1	0	1	0	4.03	0.94216
1	2	5	3	1	2	3	1	1	5	3	5	1	5	3	1	0	0	0	4.03	0.94216
2	2	3	2	1	1	9	2	1	5	2	2	1	5	2	6	0	0	1	4.03	0.94216
2	3	1	4	5	1	1	9	6	3	4	3	1	5	3	6	0	1	1	4.03	0.94216
1	2	1	2	4	1	4	1	1	3	4	1	2	5	4	2	0	1	1	4.03	0.94216
1	NA	5	2	1	9	2	9	6	1	1	2	3	5	2	4	1	1	0	4.03	0.94216
1	2	4	4	2	3	1	2	1	2	4	4	1	5	3	3	0	1	0	4.03	0.94216
1	3	2	2	4	2	2	2	2	5	1	2	1	5	4	6	0	1	0	4.03	0.94216
2	2	1	5	5	1	9	1	1	4	1	3	1	5	3	5	0	1	1	4.03	0.94216
1	2	2	2	5	2	3	9	5	2	4	2	1	5	4	2	0	1	1	4.03	0.94216
3	3	3	4	5	1	4	1	1	5	1	2	1	5	4	1	0	0	0	4.03	0.94216
2	3	3	4	3	NA	NA	2	1	5	1	3	1	5	3	2	0	1	1	4.03	0.94216
1	3	5	4	5	2	9	1	1	4	5	5	2	5	4	4	0	0	1	4.03	0.94216
1	3	6	3	2	4	1	9	4	1	1	2	2	5	3	1	0	1	0	4.03	0.94216
1	2	3	4	3	NA	3	3	NA	3	3	4	1	5	2	2	0	1	1	4.03	0.94216
1	2	3	4	3	2	3	1	1	3	4	2	1	5	3	4	0	1	0	4.03	0.94216
1	2	1	2	5	2	4	1	1	3	4	5	1	5	3	1	0	1	1	4.03	0.94216
1	3	3	2	2	3	2	1	3	2	1	4	1	5	5	2	0	1	1	4.03	0.94216
1	2	3	4	5	1	3	2	1	3	3	4	1	5	3	2	0	1	0	4.03	0.94216
2	3	1	4	5	2	3	9	4	3	5	5	1	5	1	1	0	1	1	4.03	0.94216
1	2	5	2	4	2	1	2	2	2	2	5	1	5	4	2	0	1	1	4.03	0.94216
2	1	6	2	3	1	4	1	1	5	2	2	1	5	3	4	0	1	1	4.03	0.94216
1	3	4	4	2	2	1	1	1	1	3	3	1	5	2	1	0	1	0	4.03	0.94216
2	3	3	3	5	9	9	9	6	2	5	3	2	5	3	5	0	1	0	4.03	0.94216
2	3	1	4	5	1	1	9	6	3	4	3	1	5	3	6	0	1	1	4.03	0.94216
2	2	2	2	2	1	1	4	2	4	3	3	1	5	3	2	0	1	1	4.03	0.94216
1	3	6	3	3	1	9	2	1	4	4	5	1	5	5	4	0	0	0	4.03	0.94216
1	3	5	2	3	3	1	3	4	2	1	3	1	5	4	1	0	1	0	4.03	0.94216
1	2	3	4	2	1	2	2	4	4	4	3	1	5	3	3	0	1	1	4.03	0.94216
1	3	5	3	3	2	9	1	1	3	3	3	1	5	NA	1	0	0	0	4.03	0.94216
1	3	3	5	3	2	3	1	1	3	5	4	1	5	4	6	0	1	0	4.03	0.94216
1	3	5	5	3	2	9	1	2	3	4	4	1	5	3	2	0	0	1	4.03	0.94216
1	2	3	3	3	1	9	1	1	4	4	3	1	5	NA	6	0	1	1	4.03	0.94216
3	1	3	2	2	1	4	2	1	3	5	3	1	5	4	1	0	0	1	4.03	0.94216
2	2	3	2	3	1	9	1	1	3	2	2	2	5	3	3	0	0	0	4.03	0.94216
2	2	3	2	1	1	3	1	1	5	2	3	1	5	3	6	0	0	0	4.03	0.94216
1	2	4	2	4	2	9	3	1	2	2	1	1	5	4	1	0	0	0	4.03	0.94216
3	2	6	2	3	1	9	2	1	4	3	2	1	5	4	6	0	0	0	4.03	0.94216
2	3	6	2	3	1	9	2	2	4	3	3	1	5	5	1	0	1	1	4.03	0.94216
3	3	3	5	3	2	1	2	1	3	3	5	1	5	3	3	0	1	0	4.03	0.94216
1	3	5	4	NA	2	9	1	1	4	5	4	1	5	4	4	0	0	1	4.03	0.94216
2	2	4	4	2	1	4	1	1	5	4	1	1	5	4	1	0	0	1	4.03	0.94216
1	1	4	4	2	2	9	1	1	4	5	4	1	5	4	2	0	0	0	4.03	0.94216
1	3	5	4	3	2	1	1	1	4	5	4	1	5	4	1	0	0	1	4.03	0.94216
1	3	5	5	5	2	9	1	1	4	5	4	1	5	4	5	0	0	1	4.03	0.94216
1	3	1	2	4	2	1	1	1	5	3	2	1	5	4	6	0	1	0	4.03	0.94216
1	2	2	4	2	2	3	1	1	3	4	2	1	5	3	3	0	1	1	4.03	0.94216
1	1	1	5	5	1	2	1	2	4	5	5	2	5	4	1	0	0	1	4.03	0.94216
1	1	1	5	5	1	3	2	1	5	5	3	1	5	2	5	0	1	1	4.03	0.94216
1	3	5	2	2	1	3	1	1	3	1	2	1	5	4	6	0	1	1	4.03	0.94216
1	2	3	2	3	3	3	2	2	5	4	5	1	5	3	3	0	1	1	4.03	0.94216
NA	1	2	3	3	2	1	1	3	3	4	1	1	5	3	4	0	1	1	4.03	0.94216
1	1	2	2	3	3	9	9	5	1	3	3	1	5	4	2	0	1	0	4.03	0.94216
1	3	6	1	4	2	1	9	1	1	1	3	1	5	3	2	0	0	1	4.03	0.94216
2	2	5	4	3	1	2	2	1	5	4	3	1	5	4	1	0	0	0	4.03	0.94216
2	3	2	2	2	1	4	2	1	2	5	3	1	5	3	1	0	0	1	4.03	0.94216
2	3	3	3	1	2	9	1	1	1	3	3	99	5	2	1	0	1	0	4.03	0.94216
2	3	4	1	3	2	9	1	2	4	4	3	1	5	3	4	0	0	0	4.03	0.94216
1	1	3	4	1	1	9	1	1	4	1	4	1	5	3	5	0	0	1	4.03	0.94216
2	1	5	3	2	1	2	2	1	5	4	5	2	5	2	2	0	1	1	4.03	0.94216
2	1	4	3	2	1	3	1	1	5	4	5	1	5	4	2	0	0	0	4.03	0.94216
1	3	5	2	5	3	1	9	6	5	5	5	1	5	4	2	0	1	0	4.03	0.94216
1	1	3	1	3	1	2	1	1	4	3	1	1	5	4	1	0	1	0	4.03	0.94216
1	2	2	4	2	1	3	2	1	3	4	2	1	5	4	2	0	1	0	4.03	0.94216
2	2	1	2	5	1	4	1	1	4	4	3	2	5	3	2	0	1	1	4.03	0.94216
1	2	5	2	5	2	2	9	2	5	4	5	1	5	4	3	0	1	1	4.03	0.94216
2	2	6	3	1	1	1	3	2	4	3	2	1	5	4	6	0	0	0	4.03	0.94216
2	3	5	2	2	1	4	1	1	5	5	2	1	5	2	4	0	1	1	4.03	0.94216
2	3	3	2	3	1	4	1	1	5	2	2	1	5	3	4	0	1	1	4.03	0.94216
1	3	2	1	4	2	2	4	3	3	3	2	1	5	1	2	0	0	1	4.03	0.94216
3	2	6	3	2	1	9	9	4	4	3	3	1	5	2	4	0	0	1	4.03	0.94216
1	2	4	4	3	9	3	1	1	4	2	2	1	5	4	1	0	1	1	4.03	0.94216
1	3	5	2	4	3	1	9	6	5	1	2	1	5	4	3	0	1	0	4.03	0.94216
2	3	5	3	3	1	9	1	1	4	5	5	1	5	NA	1	0	1	1	4.03	0.94216
2	2	5	3	3	1	9	1	1	1	5	4	1	5	2	2	0	1	0	4.03	0.94216
1	3	5	1	2	1	1	2	1	4	5	3	1	5	4	2	0	1	0	4.03	0.94216
1	3	5	4	5	1	9	3	2	3	4	3	1	5	4	3	0	1	1	4.03	0.94216
3	3	5	3	3	2	2	2	5	2	5	3	1	5	3	3	0	1	0	4.03	0.94216
1	3	3	3	3	1	9	2	4	2	4	5	1	5	2	4	0	1	0	4.03	0.94216
2	3	4	3	5	2	1	2	2	5	3	2	1	5	2	3	0	1	0	4.03	0.94216
2	3	4	3	2	1	9	1	1	4	3	2	1	5	3	1	0	1	1	4.03	0.94216
2	3	5	3	3	1	9	1	1	4	5	5	1	5	NA	1	0	1	0	4.03	0.94216
2	2	5	3	3	1	9	1	1	1	5	4	1	5	2	2	0	1	0	4.03	0.94216
1	3	5	1	2	1	1	2	1	4	5	3	1	5	4	2	0	1	0	4.03	0.94216
1	3	5	4	5	1	9	3	2	4	4	3	1	5	4	3	0	1	1	4.03	0.94216
3	3	5	3	3	2	2	2	5	2	5	3	1	5	3	3	0	1	0	4.03	0.94216
1	3	3	3	3	1	9	2	4	2	4	5	1	5	2	4	0	1	0	4.03	0.94216
2	3	4	3	5	2	1	2	2	5	3	2	1	5	2	3	0	1	0	4.03	0.94216
2	3	4	3	2	1	9	1	1	4	3	2	1	5	3	1	0	1	1	4.03	0.94216
1	3	3	4	3	1	1	1	1	4	4	3	1	5	4	1	0	1	1	4.03	0.94216
1	3	NA	3	1	2	9	3	2	1	3	3	1	5	3	3	0	1	1	4.03	0.94216
1	NA	3	3	3	2	9	2	1	2	3	3	1	5	4	1	0	1	0	4.03	0.94216
1	2	5	4	3	1	9	1	1	1	3	2	1	5	3	4	0	1	0	4.03	0.94216
1	3	3	4	3	1	4	1	1	3	4	3	1	5	2	2	0	1	0	4.03	0.94216
1	3	3	3	3	1	3	9	1	3	4	3	1	5	3	2	0	1	1	4.03	0.94216
1	3	5	3	2	1	3	9	2	5	4	2	2	5	3	4	0	1	1	4.03	0.94216
1	2	5	3	2	2	9	2	1	3	3	2	1	5	4	2	0	1	1	4.03	0.94216
1	2	3	4	2	3	3	1	1	5	3	1	1	5	3	5	0	1	0	4.03	0.94216
1	2	5	4	1	3	2	4	3	1	4	3	1	5	3	3	0	1	1	4.03	0.94216
1	1	5	3	3	1	4	2	1	2	1	3	1	5	3	2	0	0	1	4.03	0.94216
1	3	4	4	5	1	3	1	1	2	4	3	1	5	3	3	0	1	0	4.03	0.94216
1	2	5	4	2	2	9	4	5	1	4	1	2	5	3	4	0	1	1	4.03	0.94216
1	1	2	2	3	2	9	2	2	2	2	4	1	6	3	2	0	0	0	0.53	0.95035
1	3	3	3	5	9	9	9	6	5	5	3	3	6	4	1	0	1	0	0.53	0.95035
3	3	6	3	5	9	9	9	6	5	5	5	2	6	3	1	1	1	0	0.53	0.95035
1	3	4	1	1	1	5	2	1	3	3	4	1	6	4	2	0	1	0	0.53	0.95035
1	3	4	4	5	3	1	3	6	1	3	1	3	6	4	2	0	1	0	0.53	0.95035
1	2	3	3	1	4	4	4	5	2	4	4	1	6	4	1	0	1	1	0.53	0.95035
1	3	2	2	2	2	2	2	3	5	2	5	3	6	4	3	0	1	0	0.53	0.95035
1	3	5	3	5	1	3	1	6	5	3	2	1	6	4	1	0	1	0	0.53	0.95035
1	2	1	1	3	2	2	1	1	5	5	4	3	6	5	2	0	1	0	0.53	0.95035
1	2	3	4	5	1	2	2	1	2	2	2	1	6	4	1	0	1	1	0.53	0.95035
NA	1	1	3	3	1	1	1	NA	2	4	1	3	6	5	1	0	1	1	0.53	0.95035
3	3	6	3	5	9	9	9	6	5	5	5	3	6	3	1	0	1	1	0.53	0.95035
2	2	1	3	1	3	1	3	6	5	3	4	2	6	4	1	1	1	0	0.53	0.95035
1	3	3	3	5	2	2	2	2	5	5	2	1	6	4	2	0	1	0	0.53	0.95035
1	3	3	3	3	3	1	3	2	2	3	3	99	6	3	6	0	1	0	0.53	0.95035
1	NA	NA	3	3	3	3	2	1	4	1	2	99	6	5	1	0	1	1	0.53	0.95035
2	3	3	3	5	4	1	2	3	5	3	2	1	6	4	1	0	1	0	0.53	0.95035
3	1	1	4	1	2	2	1	1	2	4	1	99	6	NA	1	0	1	1	0.53	0.95035
1	2	4	3	5	1	9	1	5	2	4	3	99	6	3	1	0	1	1	0.53	0.95035
1	1	5	3	3	NA	2	3	5	1	4	2	99	6	NA	1	0	1	1	0.53	0.95035
1	3	2	4	3	3	1	1	6	1	5	4	4	6	NA	1	0	1	1	0.53	0.95035
1	2	3	4	5	3	1	3	2	1	5	2	99	6	3	6	0	1	0	0.53	0.95035
3	2	2	3	2	2	9	1	4	5	2	3	99	6	4	1	0	0	0	0.53	0.95035
2	2	3	3	3	3	9	9	1	2	2	2	99	6	2	2	0	1	0	0.53	0.95035
1	1	1	2	4	1	4	9	4	3	5	2	3	6	3	4	0	1	0	0.53	0.95035
1	1	2	3	2	1	9	2	1	2	1	2	1	6	4	1	0	1	1	0.53	0.95035
2	3	3	3	5	4	1	2	5	5	3	2	1	6	4	1	0	1	0	0.53	0.95035
1	2	6	4	2	1	1	2	6	1	5	5	2	6	2	6	1	1	1	0.53	0.95035
1	1	4	4	3	4	3	1	1	1	1	4	1	6	4	1	0	1	1	0.53	0.95035
1	3	4	3	1	2	3	9	6	1	1	3	99	6	3	1	0	1	NA	0.53	0.95035
1	2	4	3	1	3	2	1	1	3	1	3	1	6	2	1	0	1	1	0.53	0.95035
1	1	5	3	5	3	2	1	3	2	4	3	3	6	1	1	0	1	1	0.53	0.95035
1	2	5	2	5	2	2	2	2	1	2	3	2	6	5	4	1	1	1	0.53	0.95035
1	1	4	4	1	3	1	2	1	5	3	4	3	6	4	1	0	1	0	0.53	0.95035
1	3	3	5	5	1	9	1	1	4	5	3	3	6	4	2	0	1	0	0.53	0.95035
NA	NA	NA	NA	NA	NA	NA	NA	NA	NA	NA	NA	NA	6	3	NA	0	NA	NA	0.53	0.95035
1	3	3	3	5	1	9	1	1	1	5	2	3	6	3	3	0	1	0	0.53	0.95035
1	3	4	4	5	1	9	1	1	3	4	3	3	6	3	5	0	1	0	0.53	0.95035
1	3	6	4	1	9	3	1	2	5	3	2	3	6	5	4	0	1	0	0.53	0.95035
NA	NA	NA	NA	NA	NA	NA	NA	NA	NA	NA	NA	NA	6	4	NA	0	1	NA	0.53	0.95035
1	3	3	3	1	2	1	1	3	2	5	3	3	6	4	6	0	1	1	0.53	0.95035
1	3	3	3	1	2	3	2	4	5	5	3	2	6	1	1	1	1	0	0.53	0.95035
3	3	6	5	5	9	9	9	6	5	5	5	2	6	NA	6	1	1	NA	0.53	0.95035
NA	NA	NA	NA	NA	NA	NA	NA	NA	NA	NA	NA	NA	6	4	NA	0	1	NA	0.53	0.95035
1	2	3	3	2	3	2	3	5	1	1	3	7	6	4	1	0	1	1	0.53	0.95035
1	3	4	5	5	9	9	9	6	5	3	3	1	6	4	1	0	1	0	0.53	0.95035
1	3	4	5	5	9	9	NA	NA	5	3	3	1	6	4	1	0	1	0	0.53	0.95035
2	3	3	2	2	1	1	2	5	2	5	5	1	6	4	1	0	1	0	0.53	0.95035
1	3	6	3	3	3	9	9	6	5	3	5	1	6	4	2	0	1	1	0.53	0.95035
1	2	3	5	5	3	2	3	3	2	5	2	1	6	4	1	0	1	0	0.53	0.95035
NA	NA	NA	NA	NA	NA	NA	NA	NA	NA	NA	NA	NA	6	3	NA	0	NA	NA	0.53	0.95035
3	1	2	4	3	3	3	3	1	1	4	4	1	6	4	1	0	1	1	0.53	0.95035
2	NA	3	3	2	2	2	2	2	NA	2	5	1	6	3	1	0	1	0	0.53	0.95035
1	3	3	3	3	2	3	2	2	5	2	3	98	6	5	1	0	NA	0	0.53	0.95035
3	3	6	4	5	9	9	9	6	5	5	5	1	6	3	2	0	1	0	0.53	0.95035
1	3	2	3	3	3	1	4	3	2	3	3	1	6	3	6	0	1	0	0.53	0.95035
1	3	1	4	5	9	9	1	1	3	3	4	1	6	4	6	0	1	0	0.53	0.95035
2	3	3	2	5	2	9	2	5	5	5	4	1	6	3	6	0	1	0	0.53	0.95035
1	1	5	2	3	3	2	2	5	1	4	3	1	6	4	6	0	1	0	0.53	0.95035
3	2	2	3	5	4	9	4	6	5	2	1	1	6	4	5	0	1	0	0.53	0.95035
1	2	5	2	3	3	1	3	1	5	3	2	1	6	4	5	0	1	0	0.53	0.95035
2	2	5	3	2	2	3	2	NA	3	3	5	1	6	5	5	0	1	0	0.53	0.95035
1	3	1	4	2	2	2	2	3	3	4	2	1	6	4	5	0	1	0	0.53	0.95035
2	3	5	3	3	3	9	2	3	5	3	2	1	6	4	1	0	1	0	0.53	0.95035
1	3	4	2	5	1	9	2	1	2	2	5	1	6	5	6	0	1	1	0.53	0.95035
1	1	4	4	5	1	9	1	1	3	5	2	1	6	4	6	0	1	1	0.53	0.95035
1	NA	3	3	2	2	2	2	3	1	5	2	1	6	4	6	0	1	1	0.53	0.95035
2	3	3	2	5	1	1	2	1	1	3	3	3	6	4	1	0	NA	NA	0.53	0.95035
2	2	3	3	2	1	NA	4	5	1	4	4	1	6	NA	5	0	1	1	0.53	0.95035
1	3	2	3	5	2	1	2	6	2	3	2	1	6	3	4	0	1	1	0.53	0.95035
2	3	1	3	5	3	1	9	5	5	4	5	1	6	5	3	0	1	1	0.53	0.95035
1	3	6	3	5	9	9	2	6	5	2	2	1	6	4	3	0	1	1	0.53	0.95035
1	3	5	4	1	3	2	4	5	1	3	3	2	6	4	1	1	0	0	0.53	0.95035
1	3	6	3	5	3	2	1	1	5	5	3	1	6	NA	3	0	1	1	0.53	0.95035
3	2	3	3	3	1	3	3	2	5	3	1	3	6	3	1	0	0	1	0.53	0.95035
1	2	4	2	5	2	2	2	2	1	5	3	1	6	3	3	0	1	0	0.53	0.95035
1	3	2	3	2	3	9	4	4	1	3	2	1	6	4	2	0	1	1	0.53	0.95035
1	3	4	3	2	9	3	2	2	1	5	3	1	6	2	2	0	1	1	0.53	0.95035
1	1	5	3	2	1	2	1	2	1	3	3	1	6	4	4	0	1	1	0.53	0.95035
1	3	1	4	3	2	1	2	1	2	3	4	1	6	4	2	0	1	1	0.53	0.95035
1	2	5	3	1	2	2	2	1	2	2	3	1	6	4	2	0	1	1	0.53	0.95035
1	2	5	4	3	3	2	2	2	2	4	3	1	6	4	1	0	1	1	0.53	0.95035
1	2	6	4	1	3	1	1	6	2	4	3	1	6	3	1	0	1	1	0.53	0.95035
1	2	1	2	2	2	2	1	4	2	1	2	1	6	4	1	0	1	1	0.53	0.95035
3	3	6	3	5	9	9	9	6	5	5	5	3	6	4	4	0	0	0	0.53	0.95035
1	3	6	2	3	3	1	2	6	5	3	3	3	6	4	2	0	0	1	0.53	0.95035
1	2	5	3	4	4	1	4	2	1	5	2	2	6	4	2	1	0	1	0.53	0.95035
2	3	3	3	3	3	1	2	5	5	4	2	3	6	4	3	0	0	1	0.53	0.95035
1	2	4	3	4	2	1	2	1	2	2	3	3	6	5	6	0	0	0	0.53	0.95035
1	3	6	2	5	NA	NA	3	6	5	5	4	3	6	5	4	0	0	0	0.53	0.95035
1	3	3	3	5	3	2	2	2	5	4	3	3	6	4	6	0	0	1	0.53	0.95035
1	3	5	5	3	2	2	1	1	1	5	3	3	6	5	3	0	0	0	0.53	0.95035
1	3	4	3	5	1	1	1	3	5	4	4	1	6	4	3	0	0	0	0.53	0.95035
1	2	2	2	1	2	1	3	2	2	1	3	1	6	5	4	0	0	0	0.53	0.95035
1	2	2	1	4	2	9	2	1	2	2	4	1	6	4	2	0	0	1	0.53	0.95035
3	1	2	4	4	2	2	3	6	1	2	2	1	6	3	2	0	0	NA	0.53	0.95035
1	3	3	2	2	2	2	2	1	5	5	3	1	6	4	1	0	0	0	0.53	0.95035
1	2	6	4	5	2	1	4	5	5	5	5	1	6	3	2	0	0	1	0.53	0.95035
1	3	4	4	3	2	3	3	5	1	2	2	1	6	4	1	0	0	0	0.53	0.95035
1	2	6	3	3	2	3	2	6	5	2	2	3	6	2	4	0	0	1	0.53	0.95035
3	3	6	2	5	9	9	9	6	5	5	5	3	6	5	1	0	0	1	0.53	0.95035
1	3	5	4	1	3	2	4	5	1	3	3	NA	6	4	1	0	0	0	0.53	0.95035
2	3	3	2	5	1	1	2	1	1	3	3	2	6	4	1	1	0	0	0.53	0.95035
1	3	4	3	5	1	3	2	1	1	1	2	99	6	4	1	0	0	NA	0.53	0.95035
1	2	4	4	3	2	2	3	5	1	1	4	1	6	4	1	0	1	0	0.53	0.95035
1	2	4	3	2	2	3	1	1	2	3	3	99	6	3	6	0	0	0	0.53	0.95035
1	1	5	2	4	2	3	1	1	3	4	3	2	6	4	2	1	0	1	0.53	0.95035
1	1	2	2	3	2	2	4	5	2	NA	3	98	6	5	2	0	0	0	0.53	0.95035
1	2	5	3	2	3	3	2	1	3	4	3	3	6	3	6	0	0	0	0.53	0.95035
2	3	3	4	5	3	1	3	2	5	3	3	3	6	4	6	0	0	0	0.53	0.95035
1	3	4	3	5	3	3	4	1	1	3	3	99	6	3	6	0	0	0	0.53	0.95035
1	1	1	2	3	3	3	2	2	2	4	2	98	6	3	1	0	0	1	0.53	0.95035
2	1	6	4	1	1	2	1	1	3	5	4	3	6	5	3	0	0	0	0.53	0.95035
1	1	3	3	5	3	2	3	2	1	5	2	99	6	4	6	0	0	0	0.53	0.95035
1	3	3	4	5	2	1	2	6	5	5	2	3	6	4	2	0	0	1	0.53	0.95035
2	2	5	3	2	4	9	2	4	3	3	5	3	6	5	3	0	0	0	0.53	0.95035
3	3	6	5	NA	9	9	9	6	5	5	5	99	6	5	2	0	0	1	0.53	0.95035
1	1	4	4	2	1	3	2	5	1	3	3	98	6	5	1	0	0	1	0.53	0.95035
1	1	2	2	3	2	2	4	5	2	3	3	3	6	5	1	0	0	0	0.53	0.95035
1	1	1	3	1	1	1	3	3	2	3	3	1	6	4	6	0	0	1	0.53	0.95035
1	3	4	3	3	3	2	2	5	1	3	3	3	6	4	5	0	0	1	0.53	0.95035
3	2	3	3	3	1	3	3	2	5	3	1	2	6	3	1	1	0	1	0.53	0.95035
1	3	4	3	4	3	9	4	2	5	5	3	3	6	5	2	0	0	1	0.53	0.95035
1	3	2	3	3	9	1	2	3	1	1	3	3	6	5	3	0	0	1	0.53	0.95035
1	2	5	3	1	3	1	4	6	1	3	3	3	6	5	4	0	0	1	0.53	0.95035
3	3	6	5	5	9	9	9	6	5	5	5	3	6	NA	3	0	0	1	0.53	0.95035
1	3	1	3	3	4	2	9	3	4	3	2	3	6	2	4	0	0	1	0.53	0.95035
2	2	5	3	5	4	4	9	3	3	3	3	99	6	NA	3	0	0	1	0.53	0.95035
1	1	4	3	3	2	4	1	1	1	3	3	1	6	5	6	0	0	0	0.53	0.95035
1	3	3	2	1	1	2	9	6	5	3	3	1	6	5	6	0	0	0	0.53	0.95035
1	2	2	4	5	2	1	4	5	5	3	5	1	6	3	6	0	0	0	0.53	0.95035
1	3	4	2	5	2	9	3	3	2	2	2	1	6	3	5	0	0	0	0.53	0.95035
1	3	5	5	2	2	3	9	5	5	5	3	1	6	3	3	0	0	0	0.53	0.95035
2	2	2	2	1	3	1	3	6	5	3	4	1	6	2	4	0	0	1	0.53	0.95035
2	2	2	3	5	2	3	4	6	1	2	3	1	6	4	3	0	0	0	0.53	0.95035
1	1	1	3	2	3	3	1	1	2	1	2	1	6	3	2	0	0	0	0.53	0.95035
1	1	4	2	5	2	9	9	5	5	3	4	1	6	3	3	0	0	0	0.53	0.95035
1	2	3	3	1	3	4	9	6	1	1	5	1	6	5	2	0	0	0	0.53	0.95035
1	3	4	4	5	3	1	3	6	1	2	1	1	6	4	2	0	0	0	0.53	0.95035
1	1	5	2	4	2	3	1	1	3	NA	3	1	6	5	1	0	0	0	0.53	0.95035
1	3	4	3	5	9	9	9	2	5	5	3	1	6	3	2	0	0	0	0.53	0.95035
1	3	5	3	4	9	9	3	5	2	3	3	1	6	3	1	0	0	0	0.53	0.95035
1	3	3	3	5	3	3	4	2	3	2	4	1	6	3	1	0	0	0	0.53	0.95035
1	2	5	NA	3	1	5	3	1	3	2	1	1	6	1	1	0	0	0	0.53	0.95035
1	3	3	2	3	2	9	3	5	1	2	3	1	6	3	1	0	0	0	0.53	0.95035
1	3	6	3	3	3	9	2	1	5	2	2	1	6	4	1	0	0	0	0.53	0.95035
1	2	1	3	2	1	1	1	NA	2	4	5	1	6	5	6	0	0	1	0.53	0.95035
1	2	1	1	3	NA	2	1	1	5	5	4	1	6	5	1	0	0	1	0.53	0.95035
1	1	2	2	3	2	2	2	1	1	3	3	99	6	3	1	0	1	0	0.53	0.95035
2	3	3	4	1	2	4	2	2	5	5	2	1	6	3	1	0	0	1	0.53	0.95035
1	1	5	3	5	1	4	2	1	2	3	1	1	6	4	2	0	0	1	0.53	0.95035
1	2	3	3	4	2	1	9	2	1	3	2	1	6	3	2	0	0	1	0.53	0.95035
2	1	2	2	1	1	3	2	1	2	2	1	1	6	3	3	0	0	1	0.53	0.95035
1	3	2	4	2	9	9	2	4	3	2	5	1	6	1	2	0	0	1	0.53	0.95035
1	1	4	3	3	3	2	3	5	5	2	4	1	6	3	2	0	0	1	0.53	0.95035
1	3	4	2	2	3	2	4	1	5	4	3	1	6	3	3	0	0	1	0.53	0.95035
NA	NA	NA	2	1	NA	NA	NA	NA	NA	NA	NA	NA	6	4	NA	0	0	NA	0.53	0.95035
1	1	4	3	3	3	2	3	5	5	2	5	1	6	3	4	0	0	1	0.53	0.95035
1	1	2	2	3	2	9	2	2	2	2	4	1	6	3	4	0	0	1	0.53	0.95035
1	3	3	3	3	3	2	1	2	5	5	3	1	6	5	3	0	0	1	0.53	0.95035
1	2	4	3	3	1	2	1	5	1	1	4	1	6	5	3	0	0	1	0.53	0.95035
1	1	2	3	4	3	2	2	3	1	2	3	2	6	4	3	1	1	0	0.53	0.95035
1	2	4	3	5	3	3	1	2	3	1	3	2	6	4	3	1	1	0	0.53	0.95035
3	3	4	5	3	3	1	2	5	2	5	3	2	6	3	3	1	1	0	0.53	0.95035
2	1	1	2	2	1	9	1	1	5	2	3	2	6	5	4	1	1	0	0.53	0.95035
1	3	2	3	3	2	1	2	5	1	4	3	2	6	4	3	1	1	1	0.53	0.95035
2	2	1	4	3	2	2	1	2	3	3	2	2	6	NA	3	1	1	1	0.53	0.95035
1	1	2	2	2	2	1	2	1	1	2	3	2	6	4	1	1	1	1	0.53	0.95035
1	2	3	3	2	3	1	4	6	4	3	3	2	6	4	4	1	1	1	0.53	0.95035
1	3	3	5	2	3	1	9	6	1	3	2	2	6	3	4	1	1	1	0.53	0.95035
1	2	5	5	2	9	2	2	2	5	2	3	2	6	3	4	1	1	1	0.53	0.95035
3	3	3	5	3	9	1	3	6	5	4	4	2	6	NA	4	1	1	1	0.53	0.95035
2	3	5	4	4	9	9	9	4	5	2	5	2	6	NA	6	1	1	0	0.53	0.95035
3	3	6	5	5	NA	9	4	5	5	4	4	2	6	4	6	1	1	0	0.53	0.95035
2	2	5	2	4	4	2	4	5	5	5	3	2	6	4	6	1	1	0	0.53	0.95035
3	3	3	3	1	3	2	2	6	2	2	3	2	6	4	2	1	1	0	0.53	0.95035
1	3	2	3	5	2	2	2	1	2	2	4	2	6	5	2	1	1	1	0.53	0.95035
1	1	3	3	2	3	2	3	3	5	2	2	2	6	4	3	1	1	0	0.53	0.95035
1	3	5	2	2	3	1	3	6	1	5	3	2	6	3	3	1	1	1	0.53	0.95035
2	2	2	1	5	1	1	2	6	2	3	3	2	6	4	2	1	1	0	0.53	0.95035
1	3	5	3	2	1	4	2	1	5	3	2	2	6	4	2	1	1	0	0.53	0.95035
1	2	2	3	2	2	1	2	3	1	3	3	1	6	4	1	0	1	0	0.53	0.95035
1	3	3	4	5	3	1	2	6	1	2	2	1	6	4	3	0	1	0	0.53	0.95035
1	3	2	3	3	9	1	1	1	2	3	3	1	6	4	2	0	1	0	0.53	0.95035
1	3	6	NA	4	2	2	9	6	2	5	3	2	6	4	4	1	1	1	0.53	0.95035
3	2	5	2	2	9	9	9	6	5	2	4	2	6	1	6	1	1	0	0.53	0.95035
1	2	5	2	4	9	1	9	6	5	5	3	2	6	4	6	1	1	1	0.53	0.95035
3	3	3	3	3	3	3	3	3	4	3	3	13	6	3	6	0	1	1	0.53	0.95035
1	2	5	2	2	2	2	3	5	1	5	2	2	6	3	6	1	1	0	0.53	0.95035
3	3	6	3	2	9	9	9	6	5	3	3	2	6	3	6	1	1	1	0.53	0.95035
1	3	5	5	2	2	2	9	6	2	2	2	2	6	5	4	1	1	1	0.53	0.95035
2	2	1	3	2	9	9	9	2	5	2	4	2	6	5	6	1	1	0	0.53	0.95035
1	1	2	2	5	3	9	9	6	5	2	4	9	6	4	5	0	1	1	0.53	0.95035
1	3	6	4	5	3	2	9	6	5	5	2	12	6	4	4	0	1	1	0.53	0.95035
1	3	5	1	5	2	1	2	5	2	3	2	10	6	4	5	0	1	0	0.53	0.95035
1	3	5	5	5	2	2	2	6	5	2	2	2	6	3	4	1	1	0	0.53	0.95035
1	3	5	2	2	3	1	2	6	1	1	4	2	6	5	3	1	1	1	0.53	0.95035
1	1	4	5	2	2	1	2	6	2	3	2	2	6	3	3	1	1	0	0.53	0.95035
3	3	6	4	3	9	9	9	5	5	2	4	8	6	3	6	0	1	1	0.53	0.95035
1	1	2	4	1	3	2	2	3	1	2	2	3	6	4	1	0	1	1	0.53	0.95035
1	3	6	3	5	3	1	3	1	1	5	2	1	6	3	3	0	1	1	0.53	0.95035
1	1	3	5	3	2	1	3	1	5	4	5	1	6	3	3	0	1	0	0.53	0.95035
1	2	3	4	5	3	1	1	5	2	2	3	2	6	3	3	1	1	1	0.53	0.95035
1	3	2	2	2	9	9	4	6	1	5	4	2	6	3	4	1	1	1	0.53	0.95035
1	1	2	3	1	3	2	2	3	1	3	2	1	6	4	1	0	1	0	0.53	0.95035
1	3	4	3	1	2	3	3	5	1	1	2	2	6	4	4	1	1	0	0.53	0.95035
3	3	6	2	2	9	9	9	6	2	2	4	2	6	5	4	1	1	0	0.53	0.95035
1	3	2	3	5	9	1	9	6	2	5	3	2	6	3	4	1	1	1	0.53	0.95035
1	3	6	4	5	3	1	1	1	2	5	2	2	6	3	4	1	1	0	0.53	0.95035
1	3	3	3	5	3	9	3	6	1	2	3	3	6	4	1	0	1	0	0.53	0.95035
1	1	4	4	1	2	9	1	1	3	2	2	2	6	4	4	1	1	1	0.53	0.95035
1	2	4	2	1	3	2	1	1	1	1	2	2	6	4	3	1	1	1	0.53	0.95035
2	2	4	3	3	2	2	1	1	1	2	4	9	6	2	6	0	1	1	0.53	0.95035
1	3	2	2	5	2	2	2	2	2	3	2	11	6	NA	4	0	1	1	0.53	0.95035
1	3	4	2	2	3	1	9	5	1	2	3	2	6	4	4	1	1	0	0.53	0.95035
1	3	4	2	2	1	1	2	6	1	2	3	2	6	2	5	1	1	0	0.53	0.95035
1	1	6	2	5	1	1	3	5	1	2	3	2	6	3	4	1	1	0	0.53	0.95035
1	3	3	2	2	2	3	2	5	2	5	2	10	6	4	4	0	1	1	0.53	0.95035
1	1	5	2	3	2	2	2	2	5	2	2	2	6	4	5	1	1	0	0.53	0.95035
2	1	6	3	1	9	2	3	5	2	5	4	2	6	2	4	1	1	0	0.53	0.95035
1	1	2	4	5	2	2	4	1	1	5	3	2	6	4	3	1	1	0	0.53	0.95035
1	3	3	2	5	2	2	2	6	5	3	2	2	6	4	4	1	1	0	0.53	0.95035
1	1	5	3	5	4	1	4	5	2	5	4	2	6	3	3	1	1	1	0.53	0.95035
1	1	2	4	4	2	9	1	5	3	4	2	2	6	4	3	1	1	0	0.53	0.95035
1	1	4	3	5	3	9	2	5	2	4	3	2	6	4	4	1	1	0	0.53	0.95035
1	3	3	3	1	3	9	2	5	5	3	2	2	6	4	3	1	1	0	0.53	0.95035
1	1	3	4	3	1	NA	1	1	4	3	3	2	6	4	3	1	1	1	0.53	0.95035
1	1	5	3	5	4	1	2	1	1	3	3	2	6	4	3	1	1	0	0.53	0.95035
NA	2	3	3	4	3	2	9	3	2	3	2	2	6	4	3	1	1	1	0.53	0.95035
3	3	6	2	5	9	9	9	6	5	5	5	2	6	4	3	1	1	0	0.53	0.95035
1	2	5	2	5	9	9	9	6	5	5	3	2	6	4	1	1	1	1	0.53	0.95035
2	3	3	4	3	2	2	3	4	2	2	5	2	6	3	5	1	1	1	0.53	0.95035
2	3	3	4	2	2	2	3	4	2	1	5	NA	6	4	5	0	1	1	0.53	0.95035
3	3	5	4	3	9	4	9	6	5	3	4	1	6	2	6	0	1	1	0.53	0.95035
2	2	3	2	2	2	2	2	4	2	3	3	2	6	4	6	1	1	0	0.53	0.95035
3	3	4	4	3	4	9	2	3	5	1	1	2	6	3	6	1	0	0	0.53	0.95035
1	1	3	4	5	3	9	9	6	5	3	3	2	6	4	6	1	0	0	0.53	0.95035
1	3	1	NA	5	2	3	3	6	1	5	4	2	6	4	6	1	0	0	0.53	0.95035
3	3	1	4	3	3	4	2	2	5	3	4	2	6	3	6	1	1	0	0.53	0.95035
3	3	4	4	3	4	9	2	3	5	1	1	2	6	3	6	1	0	0	0.53	0.95035
1	1	3	4	5	3	9	9	6	5	3	3	2	6	4	6	1	0	0	0.53	0.95035
1	3	1	NA	5	2	3	3	6	1	5	4	2	6	4	6	1	0	0	0.53	0.95035
3	3	1	4	3	3	4	2	2	5	3	4	2	6	3	6	1	1	0	0.53	0.95035
2	3	5	3	5	3	1	3	5	2	2	3	2	6	4	4	1	1	0	0.53	0.95035
1	1	5	3	2	2	2	2	1	1	5	3	2	6	3	4	1	1	1	0.53	0.95035
1	3	3	3	2	1	2	3	6	2	4	3	2	6	4	4	1	1	1	0.53	0.95035
1	2	6	3	5	9	9	9	6	1	2	2	2	6	4	4	1	1	1	0.53	0.95035
2	3	3	4	2	2	4	2	3	2	4	2	9	6	5	5	0	1	1	0.53	0.95035
2	2	3	3	5	4	9	3	5	2	5	3	2	6	2	5	1	1	1	0.53	0.95035
2	2	3	3	3	3	1	3	6	1	2	4	8	6	3	5	0	1	0	0.53	0.95035
1	3	1	5	5	2	3	3	6	5	5	3	2	6	5	4	1	1	0	0.53	0.95035
2	1	3	3	1	2	3	1	2	1	5	5	2	6	3	4	1	1	0	0.53	0.95035
1	1	3	3	3	2	2	9	1	3	5	4	2	6	3	4	1	1	0	0.53	0.95035
1	1	2	2	3	2	1	9	5	5	4	1	2	6	4	4	1	1	1	0.53	0.95035
1	1	2	4	5	2	2	2	6	5	1	1	2	6	4	4	1	1	0	0.53	0.95035
1	1	5	3	3	4	3	3	5	1	1	1	1	6	3	3	0	0	0	0.53	0.95035
1	2	5	3	2	2	2	2	3	2	5	2	1	6	5	4	0	0	1	0.53	0.95035
1	2	2	5	2	2	1	1	5	2	4	2	1	6	5	4	0	0	0	0.53	0.95035
1	1	2	3	3	3	1	3	5	1	5	3	1	6	3	4	0	0	1	0.53	0.95035
1	3	5	3	3	3	1	3	6	1	3	4	1	6	3	3	0	0	1	0.53	0.95035
1	1	2	1	2	1	1	2	2	5	1	3	1	6	4	5	0	0	1	0.53	0.95035
1	3	2	3	2	3	1	9	6	1	3	3	1	6	3	4	0	0	1	0.53	0.95035
1	3	1	3	3	3	1	3	6	2	4	3	1	6	3	4	0	0	1	0.53	0.95035
1	3	5	3	2	3	1	3	3	2	1	2	1	6	2	4	0	0	0	0.53	0.95035
1	3	2	3	3	3	1	3	6	1	3	5	1	6	2	6	0	0	1	0.53	0.95035
1	3	2	5	3	2	1	3	6	2	5	3	1	6	3	6	0	0	0	0.53	0.95035
1	3	1	4	5	3	1	4	6	1	4	3	1	6	NA	5	0	0	1	0.53	0.95035
1	3	5	3	2	3	1	3	6	1	5	3	1	6	3	3	0	0	1	0.53	0.95035
3	3	2	5	5	9	1	9	6	5	2	5	1	6	3	4	0	0	0	0.53	0.95035
1	1	6	2	3	3	1	3	3	1	5	2	1	6	NA	6	0	0	0	0.53	0.95035
1	1	3	3	5	2	2	3	5	1	3	3	1	6	4	6	0	0	0	0.53	0.95035
1	3	3	2	5	1	1	9	6	5	3	3	2	6	5	6	1	0	0	0.53	0.95035
3	1	5	3	5	1	5	2	1	2	3	1	2	6	4	6	1	0	0	0.53	0.95035
1	NA	1	3	4	2	1	1	5	1	2	3	1	6	5	6	0	0	0	0.53	0.95035
1	3	3	3	1	1	4	1	2	3	3	3	2	6	1	6	1	0	0	0.53	0.95035
1	1	2	3	5	3	2	2	5	2	2	3	1	6	4	6	0	0	0	0.53	0.95035
NA	3	5	3	5	2	1	9	6	NA	3	3	1	6	3	6	0	0	0	0.53	0.95035
1	3	5	5	5	2	9	9	5	2	3	3	1	6	3	6	0	0	0	0.53	0.95035
1	3	5	4	1	1	1	9	1	1	2	4	1	6	5	6	0	0	1	0.53	0.95035
1	2	4	3	3	2	1	3	6	2	3	4	1	6	5	6	0	0	0	0.53	0.95035
1	1	5	4	3	3	9	2	1	5	5	4	2	6	5	3	1	0	0	0.53	0.95035
1	1	2	3	2	3	1	2	5	1	2	2	1	6	4	4	0	0	1	0.53	0.95035
2	3	5	3	5	3	1	4	5	1	2	2	1	6	4	4	0	0	1	0.53	0.95035
1	3	1	3	5	3	1	9	6	1	5	4	1	6	NA	6	0	0	1	0.53	0.95035
1	1	1	4	4	2	1	2	3	5	1	1	4	6	3	6	0	0	1	0.53	0.95035
1	3	5	5	5	2	1	3	6	5	5	2	1	6	3	6	0	0	1	0.53	0.95035
1	3	4	2	3	2	2	1	1	4	4	2	1	6	2	6	0	0	1	0.53	0.95035
1	2	4	3	3	2	3	1	1	1	2	1	1	6	4	6	0	0	1	0.53	0.95035
1	3	1	3	5	3	1	2	6	1	4	3	1	6	4	6	0	0	0	0.53	0.95035
3	3	5	3	5	2	9	2	5	5	5	2	1	6	3	6	0	0	0	0.53	0.95035
1	2	5	4	3	3	1	3	6	2	5	2	2	6	4	4	1	0	1	0.53	0.95035
1	1	6	4	3	3	3	2	1	1	5	2	1	6	NA	3	0	0	1	0.53	0.95035
2	2	2	4	1	2	3	2	2	5	5	3	1	6	4	3	0	0	1	0.53	0.95035
2	1	1	3	3	9	1	2	1	1	3	4	1	6	3	4	0	0	0	0.53	0.95035
1	1	2	3	5	2	3	1	1	1	5	3	1	6	5	3	0	0	0	0.53	0.95035
1	2	2	3	2	2	1	2	3	1	3	3	1	6	4	1	0	1	0	0.53	0.95035
1	3	3	4	5	3	1	2	6	1	2	2	1	6	4	3	0	1	0	0.53	0.95035
1	3	5	3	2	3	1	3	6	1	5	3	1	6	3	3	0	0	1	0.53	0.95035
1	3	2	3	3	9	1	1	1	2	3	3	1	6	5	2	0	1	0	0.53	0.95035
1	1	2	1	2	1	1	2	2	5	1	3	1	6	4	5	0	0	1	0.53	0.95035
1	3	2	2	5	1	1	9	6	5	3	3	1	6	5	6	0	0	0	0.53	0.95035
1	1	3	3	5	2	2	3	5	1	3	3	1	6	4	6	0	0	0	0.53	0.95035
1	1	6	2	3	2	1	3	3	1	5	2	1	6	NA	6	0	0	0	0.53	0.95035
3	3	3	3	3	3	3	3	3	3	3	3	13	6	3	6	0	1	1	0.53	0.95035
1	1	5	2	1	1	4	1	4	1	3	3	2	7	4	6	1	0	0	6.76	1.22734
1	1	3	2	4	3	1	4	4	1	3	3	2	7	3	3	1	0	1	6.76	1.22734
1	3	5	2	1	1	1	3	6	1	4	4	2	7	4	1	1	0	1	6.76	1.22734
1	3	1	2	3	3	9	1	4	2	3	2	2	7	2	6	1	0	0	6.76	1.22734
1	1	5	2	3	1	1	3	2	1	3	4	2	7	3	4	1	0	0	6.76	1.22734
1	2	4	3	2	2	2	1	1	1	3	2	2	7	4	4	1	0	1	6.76	1.22734
1	1	4	3	1	3	1	2	3	2	3	2	2	7	2	4	1	0	1	6.76	1.22734
1	1	5	3	2	3	1	1	3	1	3	2	2	7	2	5	1	0	0	6.76	1.22734
1	1	3	3	5	NA	1	2	3	1	3	2	2	7	2	5	1	0	0	6.76	1.22734
1	1	5	5	1	3	1	1	3	1	4	2	2	7	2	5	1	0	0	6.76	1.22734
1	2	5	1	3	2	1	2	1	1	1	3	2	7	2	5	1	0	0	6.76	1.22734
1	2	5	2	1	2	3	2	6	2	3	4	2	7	3	5	1	0	0	6.76	1.22734
1	3	5	2	4	2	1	9	6	2	3	4	2	7	3	1	1	0	1	6.76	1.22734
1	3	5	2	5	9	1	3	6	1	5	5	2	7	NA	2	1	1	1	6.76	1.22734
1	2	5	2	4	1	9	2	6	1	4	4	2	7	2	4	1	0	1	6.76	1.22734
1	1	4	2	2	2	2	1	4	1	1	1	2	7	4	4	1	0	0	6.76	1.22734
1	1	4	2	3	2	3	1	4	1	3	3	2	7	4	3	1	0	0	6.76	1.22734
1	1	3	3	3	2	1	1	1	1	5	3	2	7	2	4	1	0	1	6.76	1.22734
1	1	4	2	4	2	2	3	4	1	3	3	2	7	2	1	1	0	1	6.76	1.22734
1	1	3	3	4	3	2	3	4	1	5	2	2	7	3	1	1	0	1	6.76	1.22734
1	1	4	1	3	3	1	3	5	1	3	3	2	7	3	1	1	0	0	6.76	1.22734
1	1	4	2	1	2	2	3	4	1	3	3	2	7	3	1	1	0	0	6.76	1.22734
1	1	3	1	3	1	9	1	1	1	3	2	2	7	3	3	1	0	0	6.76	1.22734
1	2	1	2	3	1	1	1	1	3	5	2	1	7	5	1	0	1	0	6.76	1.22734
1	3	1	1	4	1	1	1	1	3	4	2	1	7	3	2	0	1	1	6.76	1.22734
2	1	5	2	NA	1	9	9	1	5	4	2	1	7	4	4	0	1	0	6.76	1.22734
1	2	4	1	5	2	1	1	1	3	5	3	1	7	4	3	0	1	1	6.76	1.22734
2	3	3	3	5	1	1	2	2	1	3	2	1	7	3	4	0	1	0	6.76	1.22734
2	3	3	3	1	1	1	1	1	5	2	3	1	7	4	1	0	1	0	6.76	1.22734
1	3	3	3	3	1	3	1	6	3	4	4	1	7	2	1	0	1	1	6.76	1.22734
2	3	5	3	5	1	3	2	1	5	5	2	1	7	3	4	0	1	0	6.76	1.22734
2	3	2	1	5	1	9	2	3	4	3	4	1	7	2	3	0	1	1	6.76	1.22734
2	1	2	5	4	2	1	9	6	5	NA	3	1	7	3	4	0	1	0	6.76	1.22734
1	3	1	4	3	1	4	1	1	3	2	4	1	7	2	5	0	1	1	6.76	1.22734
1	3	5	5	3	1	2	2	6	2	5	2	1	7	3	1	0	1	0	6.76	1.22734
1	3	4	3	5	1	3	2	3	5	5	3	1	7	3	2	0	1	1	6.76	1.22734
1	1	3	5	3	1	9	2	2	2	5	4	1	7	4	6	0	1	1	6.76	1.22734
1	3	3	5	5	1	9	9	3	2	3	4	1	7	4	1	0	1	0	6.76	1.22734
2	3	6	5	5	1	3	1	1	5	2	3	1	7	2	2	0	0	0	6.76	1.22734
1	2	5	2	2	1	4	1	1	2	3	4	1	7	4	1	0	0	1	6.76	1.22734
1	3	2	2	1	1	3	2	1	5	5	3	1	7	NA	2	0	1	1	6.76	1.22734
3	3	6	3	5	1	2	2	2	5	5	3	1	7	4	1	0	0	0	6.76	1.22734
1	3	5	3	5	1	1	3	1	5	2	3	1	7	3	4	0	0	0	6.76	1.22734
2	3	5	1	3	1	9	9	6	2	5	4	1	7	2	4	0	1	0	6.76	1.22734
3	1	5	2	3	1	3	2	2	4	1	3	1	7	2	4	0	0	1	6.76	1.22734
1	1	4	1	3	1	2	4	1	1	2	4	1	7	2	3	0	0	1	6.76	1.22734
1	2	5	2	3	1	1	1	1	2	5	2	1	7	3	3	0	0	0	6.76	1.22734
1	1	2	3	3	2	1	1	1	2	4	3	1	7	3	4	0	1	1	6.76	1.22734
2	3	5	2	3	2	1	2	5	2	2	3	2	7	4	1	1	0	0	6.76	1.22734
1	2	3	2	3	2	1	2	4	2	5	3	1	7	3	4	0	0	0	6.76	1.22734
1	2	1	3	3	2	1	1	1	1	1	3	1	7	3	4	0	0	0	6.76	1.22734
1	2	5	2	3	2	9	2	5	5	5	2	3	7	3	6	0	0	0	6.76	1.22734
1	3	5	2	4	1	4	2	1	1	4	4	3	7	3	3	0	0	0	6.76	1.22734
1	2	3	2	2	1	4	1	1	5	3	2	3	7	2	5	0	0	1	6.76	1.22734
1	1	3	4	3	1	9	1	1	1	5	3	3	7	4	2	0	0	0	6.76	1.22734
1	1	2	2	3	1	9	1	2	5	3	3	3	7	4	2	0	0	1	6.76	1.22734
1	2	5	3	3	2	1	2	2	5	2	2	1	7	4	1	0	0	0	6.76	1.22734
3	3	2	4	1	2	3	2	1	3	3	1	1	7	1	4	0	0	1	6.76	1.22734
1	2	5	2	3	1	1	2	1	2	3	3	1	7	2	5	0	0	0	6.76	1.22734
1	2	2	2	NA	1	4	2	1	3	1	3	1	7	3	3	0	0	0	6.76	1.22734
1	2	2	3	1	1	1	1	1	1	1	3	1	7	3	6	0	0	1	6.76	1.22734
2	3	5	2	5	1	4	9	3	1	2	3	1	7	4	2	0	0	0	6.76	1.22734
1	3	2	3	3	2	1	2	2	2	3	2	1	7	4	4	0	0	1	6.76	1.22734
1	3	5	2	1	2	1	9	6	1	5	3	1	7	2	5	0	0	1	6.76	1.22734
1	3	5	1	5	1	2	9	3	2	5	2	1	7	3	6	0	0	0	6.76	1.22734
1	3	5	3	5	1	9	1	1	3	3	3	1	7	4	5	0	1	0	6.76	1.22734
1	2	3	1	2	1	4	1	1	1	1	3	1	7	3	2	0	0	1	6.76	1.22734
1	3	5	2	5	2	3	1	2	5	5	5	1	7	4	2	0	0	0	6.76	1.22734
2	3	5	1	3	1	1	1	5	3	5	3	3	7	3	3	0	1	0	6.76	1.22734
1	3	2	4	3	2	1	9	5	1	5	5	2	7	3	2	1	0	1	6.76	1.22734
1	2	3	3	2	1	1	1	5	3	1	4	1	7	4	3	0	1	1	6.76	1.22734
2	3	3	3	2	1	2	1	3	3	5	3	1	7	3	6	0	0	0	6.76	1.22734
1	2	5	3	5	1	3	2	3	5	5	2	1	7	3	1	0	1	1	6.76	1.22734
1	2	1	2	2	1	9	1	1	4	1	2	1	7	2	6	0	1	0	6.76	1.22734
2	2	6	4	2	2	1	2	6	5	5	2	1	7	2	4	0	0	0	6.76	1.22734
1	2	5	2	3	3	2	3	3	2	5	2	2	7	3	3	1	0	1	6.76	1.22734
1	3	2	2	2	1	4	9	2	2	3	5	1	7	3	3	0	1	1	6.76	1.22734
1	3	3	2	3	2	1	4	5	1	2	2	1	7	4	5	0	1	1	6.76	1.22734
1	2	5	2	3	2	9	2	3	3	2	2	1	7	4	1	0	0	1	6.76	1.22734
1	2	5	2	3	2	1	2	2	1	2	3	2	7	3	6	1	0	1	6.76	1.22734
1	2	3	2	2	2	3	2	2	3	3	2	1	7	4	1	0	0	0	6.76	1.22734
1	1	3	2	2	2	3	2	4	3	3	1	99	7	3	3	0	0	0	6.76	1.22734
1	2	3	NA	2	3	2	3	3	2	3	2	1	7	4	1	0	0	0	6.76	1.22734
1	2	3	2	2	3	9	2	3	3	4	3	1	7	3	1	0	0	1	6.76	1.22734
1	2	3	3	3	2	9	2	1	4	3	3	1	7	3	1	0	1	1	6.76	1.22734
2	3	3	3	2	1	1	2	1	4	5	3	1	7	3	2	0	1	0	6.76	1.22734
1	2	3	3	3	2	1	3	1	5	5	3	1	7	4	2	0	1	1	6.76	1.22734
2	3	1	4	3	1	3	2	1	4	5	1	1	7	2	4	0	1	0	6.76	1.22734
1	3	5	3	5	2	1	2	3	2	3	2	1	7	3	1	0	1	0	6.76	1.22734
1	1	5	NA	5	3	1	3	3	1	3	2	2	7	3	2	1	0	1	6.76	1.22734
1	1	5	5	1	3	1	1	4	1	4	2	2	7	2	1	1	0	1	6.76	1.22734
1	2	5	5	5	4	3	3	4	1	5	4	2	7	2	1	1	0	1	6.76	1.22734
3	1	5	3	NA	1	3	2	6	5	4	4	2	7	NA	1	1	0	1	6.76	1.22734
1	3	4	5	2	3	1	1	3	1	3	1	2	7	3	2	1	0	0	6.76	1.22734
1	2	5	2	3	2	1	4	5	1	4	3	1	7	3	1	0	1	1	6.76	1.22734
2	1	5	2	3	1	3	2	1	2	4	4	1	7	2	3	0	1	1	6.76	1.22734
2	2	3	2	2	1	4	2	5	2	2	3	2	7	2	6	1	0	0	6.76	1.22734
2	2	5	1	3	2	4	2	4	2	2	3	1	7	2	6	0	0	0	6.76	1.22734
1	2	2	5	5	3	9	9	6	5	5	2	1	7	3	5	0	1	1	6.76	1.22734
1	3	5	3	2	1	9	2	2	3	4	2	2	7	2	3	1	1	0	6.76	1.22734
1	1	3	2	2	3	1	9	6	2	1	3	2	7	3	6	1	1	0	6.76	1.22734
3	2	4	3	3	1	1	3	6	2	3	2	99	7	3	5	0	1	1	6.76	1.22734
1	2	NA	2	3	1	9	1	1	2	4	2	1	7	4	6	0	0	1	6.76	1.22734
1	3	5	2	5	2	9	3	1	1	4	3	1	7	3	2	0	0	0	6.76	1.22734
2	1	3	2	3	1	1	2	1	1	1	1	1	7	3	3	0	0	0	6.76	1.22734
3	3	1	4	3	1	3	1	1	4	5	2	1	7	2	1	0	1	0	6.76	1.22734
1	3	5	2	3	2	9	2	3	1	5	2	1	7	2	4	0	0	1	6.76	1.22734
1	1	5	2	1	2	3	4	3	2	3	2	1	7	4	6	0	0	1	6.76	1.22734
2	2	2	5	2	1	3	2	2	3	4	3	1	7	4	3	0	0	0	6.76	1.22734
1	2	3	2	3	1	4	1	1	1	4	3	1	7	3	4	0	0	0	6.76	1.22734
1	2	5	1	2	1	4	2	4	2	2	3	1	7	3	6	0	0	1	6.76	1.22734
1	3	3	3	2	2	1	2	5	1	1	3	1	7	4	4	0	1	0	6.76	1.22734
1	1	5	3	3	1	1	3	3	2	1	3	1	7	2	6	0	1	1	6.76	1.22734
1	3	6	4	1	1	3	9	1	5	5	3	5	7	3	3	0	1	1	6.76	1.22734
2	3	4	2	5	1	1	1	1	5	3	4	1	7	3	1	0	1	1	6.76	1.22734
1	1	5	2	5	1	1	2	1	1	3	3	1	7	3	3	0	1	0	6.76	1.22734
1	3	5	2	3	2	2	1	5	1	5	5	2	7	5	2	1	0	0	6.76	1.22734
1	1	3	3	2	2	1	3	4	2	1	3	1	7	2	2	0	0	1	6.76	1.22734
3	1	3	4	2	1	1	2	6	NA	4	1	1	7	1	5	0	0	0	6.76	1.22734
3	3	6	4	1	1	3	9	6	5	3	5	1	7	1	3	0	0	1	6.76	1.22734
2	3	5	2	1	1	1	1	1	1	3	5	1	7	2	3	0	0	0	6.76	1.22734
1	1	2	2	3	1	2	1	2	4	3	2	1	7	3	6	0	0	0	6.76	1.22734
1	3	3	3	3	2	2	2	1	3	2	4	1	7	3	3	0	1	1	6.76	1.22734
1	2	3	3	5	1	1	1	2	3	2	3	1	7	4	5	0	1	0	6.76	1.22734
1	3	5	2	3	1	9	9	6	1	4	4	1	7	4	3	0	0	0	6.76	1.22734
1	2	5	3	3	1	1	3	5	2	2	3	1	7	4	4	0	0	1	6.76	1.22734
1	3	5	1	2	1	1	9	6	1	4	4	1	7	4	1	0	0	0	6.76	1.22734
1	3	5	2	3	1	9	9	1	1	5	4	1	7	4	2	0	0	0	6.76	1.22734
2	2	5	1	1	1	1	2	1	1	4	4	1	7	3	1	0	0	0	6.76	1.22734
1	2	5	3	5	1	1	4	1	3	4	2	1	7	2	6	0	1	1	6.76	1.22734
1	1	5	3	3	1	1	1	2	2	2	3	1	7	4	4	0	1	0	6.76	1.22734
2	2	5	2	2	1	4	2	5	3	2	3	1	7	3	6	0	0	1	6.76	1.22734
2	3	6	2	3	1	9	2	3	2	2	3	2	7	4	1	1	0	0	6.76	1.22734
1	2	3	3	2	3	2	2	3	5	3	3	1	7	2	5	0	0	1	6.76	1.22734
1	1	2	4	1	2	1	3	4	2	3	2	1	7	1	4	0	0	0	6.76	1.22734
1	2	3	1	2	1	1	2	1	2	1	3	1	7	3	4	0	0	1	6.76	1.22734
1	2	5	3	3	2	1	2	1	3	4	3	1	7	3	3	0	1	0	6.76	1.22734
1	2	2	2	5	1	3	2	1	5	5	3	1	7	3	1	0	1	0	6.76	1.22734
2	2	1	4	2	1	2	2	1	2	1	3	1	7	1	5	0	0	1	6.76	1.22734
1	1	4	3	2	2	1	1	3	2	3	2	2	7	3	4	1	0	1	6.76	1.22734
1	2	5	3	1	4	1	4	5	1	3	3	2	7	4	2	1	0	1	6.76	1.22734
1	3	1	3	1	1	1	3	5	1	2	3	2	7	3	3	1	0	0	6.76	1.22734
1	1	1	2	2	3	1	1	3	1	3	2	2	7	3	1	1	0	1	6.76	1.22734
1	1	5	4	3	NA	1	1	5	2	4	2	2	7	1	3	1	0	1	6.76	1.22734
2	2	3	2	2	2	3	2	4	2	2	3	1	7	4	3	0	0	1	6.76	1.22734
2	3	6	2	4	1	9	2	3	2	2	3	1	7	4	2	0	0	0	6.76	1.22734
1	3	4	2	1	1	3	2	3	2	3	3	1	7	4	1	0	0	0	6.76	1.22734
1	3	5	2	1	1	3	2	3	5	5	2	1	7	3	3	0	1	0	6.76	1.22734
1	3	2	2	5	1	3	1	1	5	3	5	3	7	4	1	0	1	1	6.76	1.22734
3	2	4	3	3	1	3	1	4	2	3	2	1	7	3	1	0	0	1	6.76	1.22734
1	1	4	4	3	2	3	4	3	1	5	1	1	7	4	4	0	1	0	6.76	1.22734
2	3	3	2	3	1	3	9	1	5	2	5	4	7	NA	6	0	1	1	6.76	1.22734
1	3	2	1	2	1	9	9	1	3	5	2	4	7	4	3	0	1	0	6.76	1.22734
2	3	6	5	5	1	1	9	6	5	1	3	1	7	2	5	0	0	0	6.76	1.22734
1	3	1	4	3	1	3	2	1	3	5	2	1	7	1	6	0	1	0	6.76	1.22734
2	3	5	2	2	1	3	9	5	1	2	4	1	7	3	3	0	0	0	6.76	1.22734
1	2	5	2	3	1	3	1	2	4	2	2	1	7	3	1	0	0	1	6.76	1.22734
2	2	6	5	2	2	1	2	1	5	5	3	1	7	NA	1	0	0	0	6.76	1.22734
3	2	6	5	5	2	1	9	3	5	5	3	1	7	NA	4	0	0	0	6.76	1.22734
2	3	5	2	3	9	2	9	1	2	2	4	1	7	3	1	0	1	0	6.76	1.22734
1	3	5	3	5	1	3	9	2	3	3	3	1	7	3	1	0	1	1	6.76	1.22734
1	3	5	2	2	1	9	1	1	5	2	4	1	7	4	1	0	1	0	6.76	1.22734
1	3	5	3	3	1	3	3	1	2	3	2	1	7	4	1	0	1	0	6.76	1.22734
1	2	4	4	1	1	3	1	3	5	4	2	1	7	4	3	0	0	1	6.76	1.22734
1	2	3	2	3	2	1	1	1	5	1	3	1	7	4	1	0	1	1	6.76	1.22734
1	1	3	2	2	1	1	1	2	2	2	3	4	7	3	2	0	1	1	6.76	1.22734
1	2	2	2	3	1	4	2	1	3	1	4	8	7	3	3	0	0	1	6.76	1.22734
2	1	5	3	3	1	3	1	1	3	2	2	1	7	NA	3	0	0	1	6.76	1.22734
3	2	3	3	3	1	9	1	1	5	3	2	1	7	1	5	0	1	0	6.76	1.22734
1	1	5	3	2	2	2	2	3	1	5	1	2	7	3	1	1	0	0	6.76	1.22734
1	1	5	5	5	2	2	2	5	1	2	2	2	7	4	3	1	0	0	6.76	1.22734
1	2	3	3	2	1	3	2	1	3	1	3	1	7	3	3	0	0	1	6.76	1.22734
1	2	3	1	2	1	1	2	1	2	1	3	1	7	3	3	0	0	1	6.76	1.22734
3	3	5	4	3	1	1	9	6	5	4	4	1	7	3	5	0	0	0	6.76	1.22734
2	2	6	2	2	2	1	9	6	5	5	3	1	7	1	2	0	1	1	6.76	1.22734
2	2	4	4	4	1	9	2	4	1	3	4	1	7	3	5	0	1	0	6.76	1.22734
1	2	3	4	1	1	3	1	1	5	2	5	1	7	NA	4	0	1	1	6.76	1.22734
1	3	3	3	3	2	2	1	1	2	1	4	1	7	4	3	0	1	0	6.76	1.22734
1	2	2	4	3	1	1	3	1	3	2	3	1	7	3	1	0	0	1	6.76	1.22734
1	3	6	2	2	1	4	2	4	3	3	3	1	7	3	6	0	0	1	6.76	1.22734
2	2	1	4	2	1	1	1	5	3	5	1	1	7	1	5	0	0	0	6.76	1.22734
1	1	5	3	2	1	2	1	3	1	3	1	2	7	2	4	1	0	0	6.76	1.22734
1	1	5	3	2	3	1	1	3	1	3	2	2	7	3	4	1	0	0	6.76	1.22734
1	3	4	1	4	1	9	2	4	1	3	2	2	7	4	3	1	0	1	6.76	1.22734
1	3	2	3	3	2	1	2	3	1	3	2	2	7	2	1	1	0	0	6.76	1.22734
1	1	3	2	2	3	1	3	3	1	3	2	2	7	3	1	1	0	0	6.76	1.22734
2	3	3	3	3	1	4	1	3	3	5	4	1	7	5	4	0	0	1	6.76	1.22734
1	1	5	4	2	3	2	1	3	1	3	1	2	7	3	4	1	0	0	6.76	1.22734
1	2	3	2	2	1	4	3	3	1	4	2	2	7	4	3	1	0	0	6.76	1.22734
2	2	3	3	2	2	1	2	3	2	2	3	1	7	4	1	0	0	1	6.76	1.22734
2	2	5	3	3	2	1	2	5	2	2	3	1	7	3	1	0	0	0	6.76	1.22734
1	2	2	3	5	2	1	2	1	1	1	3	1	7	4	5	0	0	1	6.76	1.22734
1	2	3	1	2	1	1	2	1	2	3	3	1	7	3	3	0	0	1	6.76	1.22734
2	3	3	5	2	1	3	9	4	2	2	3	1	7	3	4	0	0	0	6.76	1.22734
2	3	2	2	3	1	2	4	1	2	2	2	1	7	3	5	0	0	0	6.76	1.22734
1	2	3	2	3	2	3	2	4	2	2	3	1	7	3	5	0	0	0	6.76	1.22734
2	3	5	2	2	1	3	2	4	5	2	3	1	7	4	5	0	0	1	6.76	1.22734
2	3	5	2	2	1	9	2	4	5	2	3	1	7	3	1	0	0	1	6.76	1.22734
1	3	5	3	2	2	4	1	1	5	2	3	1	7	3	2	0	1	0	6.76	1.22734
2	3	2	2	5	1	9	2	2	1	2	5	1	7	2	3	0	1	0	6.76	1.22734
2	1	2	2	3	1	2	2	1	2	4	3	1	7	3	4	0	1	1	6.76	1.22734
2	3	4	5	2	1	1	9	1	2	2	3	1	7	4	5	0	0	1	6.76	1.22734
3	3	6	2	3	1	2	2	4	2	5	3	1	7	2	3	0	1	0	6.76	1.22734
2	2	5	1	3	2	4	2	4	2	2	3	1	7	2	6	0	0	0	6.76	1.22734
2	3	1	4	3	1	3	1	1	4	5	4	1	7	3	6	0	0	0	6.76	1.22734
1	3	4	2	5	1	3	2	1	5	5	3	1	7	4	1	0	1	0	6.76	1.22734
3	3	6	2	5	1	1	9	5	1	3	5	1	7	2	1	0	1	1	6.76	1.22734
1	3	5	2	2	2	1	2	2	2	5	3	1	7	2	6	0	1	1	6.76	1.22734
1	3	4	3	3	1	3	3	3	3	4	2	1	7	2	4	0	1	1	6.76	1.22734
2	3	5	2	3	2	9	2	1	2	2	3	1	7	NA	1	0	1	0	6.76	1.22734
2	3	5	3	1	3	2	3	3	1	5	3	2	7	3	2	1	0	0	6.76	1.22734
1	1	5	3	2	3	1	1	3	1	3	2	2	7	3	1	1	0	1	6.76	1.22734
1	3	5	2	5	1	2	2	2	5	4	2	1	7	4	1	0	1	1	6.76	1.22734
1	3	1	4	3	1	4	1	1	4	2	1	1	7	2	1	0	0	1	6.76	1.22734
1	3	5	1	5	1	4	2	5	2	3	2	1	7	4	5	0	1	1	6.76	1.22734
3	1	NA	2	2	1	4	1	1	NA	3	2	1	7	3	5	0	1	0	6.76	1.22734
1	1	5	3	2	1	1	1	1	4	4	5	4	7	2	3	0	1	0	6.76	1.22734
1	1	5	5	1	3	1	1	3	1	4	2	2	7	3	6	1	0	0	6.76	1.22734
1	2	3	3	2	1	1	1	2	3	1	3	4	7	3	2	0	1	1	6.76	1.22734
1	1	5	2	3	2	9	1	1	2	5	2	4	7	3	4	0	1	1	6.76	1.22734
1	1	5	2	5	2	2	3	5	1	2	2	1	7	4	3	0	1	0	6.76	1.22734
1	1	5	2	5	1	4	1	5	2	4	2	1	7	3	5	0	1	0	6.76	1.22734
2	3	2	3	5	1	4	2	1	4	5	5	1	7	3	3	0	1	0	6.76	1.22734
2	3	NA	2	2	1	9	2	1	2	4	3	1	7	2	5	0	1	0	6.76	1.22734
1	3	4	5	3	2	1	3	1	2	5	2	1	7	4	2	0	1	0	6.76	1.22734
1	3	5	2	3	2	1	2	4	3	5	2	2	7	2	5	1	0	0	6.76	1.22734
1	1	5	2	3	2	3	2	3	1	5	1	2	7	3	3	1	0	1	6.76	1.22734
1	3	5	2	5	1	2	9	3	5	5	2	1	7	3	6	0	0	0	6.76	1.22734
1	3	5	3	5	1	2	2	3	5	3	2	1	7	3	3	0	0	1	6.76	1.22734
2	1	2	3	3	2	3	2	5	5	3	1	1	7	4	3	0	0	0	6.76	1.22734
1	2	5	4	3	1	1	1	1	4	4	4	1	7	2	6	0	1	0	6.76	1.22734
3	3	4	2	5	1	9	9	6	1	5	3	1	7	3	4	0	1	0	6.76	1.22734
1	2	5	3	3	1	3	3	3	1	1	2	1	7	3	5	0	1	1	6.76	1.22734
1	3	5	2	1	3	2	4	5	1	3	3	1	7	2	3	0	1	0	6.76	1.22734
NA	3	5	2	1	2	2	3	5	1	5	4	2	7	4	6	1	0	0	6.76	1.22734
2	1	5	2	4	9	1	2	6	5	5	1	1	7	3	1	0	0	0	6.76	1.22734
3	3	2	4	3	1	3	2	1	3	5	1	1	7	2	6	0	0	0	6.76	1.22734
1	3	5	2	3	1	9	1	2	2	3	3	1	7	4	1	0	0	0	6.76	1.22734
1	3	5	5	3	1	9	2	3	5	4	5	1	7	3	4	0	0	1	6.76	1.22734
1	2	5	3	3	1	9	4	1	1	2	3	1	7	3	1	0	0	1	6.76	1.22734
2	3	1	4	3	1	3	1	1	4	4	1	1	7	2	5	0	0	0	6.76	1.22734
1	2	5	2	4	1	9	2	2	2	4	4	1	7	3	6	0	0	0	6.76	1.22734
1	3	2	3	3	3	1	2	2	5	5	2	4	7	3	3	0	1	0	6.76	1.22734
1	2	4	1	3	1	9	1	1	1	1	4	1	7	3	3	0	0	1	6.76	1.22734
1	3	5	2	5	1	3	2	3	5	5	2	1	7	1	6	0	1	1	6.76	1.22734
1	3	5	1	2	1	1	2	6	2	4	4	3	7	5	3	0	0	1	6.76	1.22734
3	3	6	4	2	1	9	1	1	4	4	4	1	7	3	2	0	0	1	6.76	1.22734
2	3	4	5	4	1	4	1	1	4	5	3	1	7	4	6	0	0	1	6.76	1.22734
1	2	3	2	5	2	3	2	1	5	5	2	1	7	5	4	0	0	1	6.76	1.22734
2	3	5	2	3	1	3	9	5	1	2	3	2	7	3	2	1	0	1	6.76	1.22734
1	1	5	5	3	1	3	4	2	3	4	2	1	7	3	4	0	1	1	6.76	1.22734
1	3	5	2	3	2	9	2	6	2	3	4	2	7	2	3	1	0	1	6.76	1.22734
1	3	1	2	2	1	4	1	1	5	3	3	1	7	3	3	0	1	0	6.76	1.22734
1	2	3	2	2	1	1	1	2	2	2	4	1	7	4	2	0	1	0	6.76	1.22734
1	3	5	3	5	1	1	9	1	1	4	4	3	7	3	3	0	0	0	6.76	1.22734
1	2	2	3	2	1	1	2	2	1	3	2	1	7	2	3	0	0	0	6.76	1.22734
1	3	5	4	2	2	3	4	5	1	4	2	1	7	3	5	0	1	1	6.76	1.22734
2	3	2	3	3	1	9	1	1	1	3	3	1	7	2	6	0	1	0	6.76	1.22734
2	3	5	2	2	1	1	1	2	1	3	5	1	7	3	5	0	1	0	6.76	1.22734
2	3	4	4	3	1	NA	1	1	5	4	4	1	7	4	2	0	0	1	6.76	1.22734
1	1	3	2	3	1	1	2	2	2	3	2	1	7	3	4	0	1	1	6.76	1.22734
2	3	2	2	3	1	1	1	6	5	2	3	1	7	3	5	0	0	1	6.76	1.22734
1	NA	4	2	3	2	3	2	3	5	4	2	1	7	3	2	0	0	0	6.76	1.22734
2	3	4	3	2	1	2	2	3	2	5	3	1	7	2	1	0	1	0	6.76	1.22734
1	2	3	1	2	1	5	2	2	3	1	1	1	7	5	5	0	1	1	6.76	1.22734
2	2	5	1	3	1	1	1	5	5	2	4	1	7	2	1	0	0	1	6.76	1.22734
2	1	1	1	1	1	3	9	6	5	4	3	1	7	2	1	0	1	1	6.76	1.22734
2	1	1	2	2	1	3	1	1	4	2	2	1	7	3	1	0	0	1	6.76	1.22734
1	2	3	3	1	2	9	2	1	4	2	2	6	7	2	6	0	1	0	6.76	1.22734
1	2	3	2	2	1	4	1	1	3	2	2	1	7	3	2	0	0	1	6.76	1.22734
1	3	4	1	3	1	9	1	1	3	1	5	1	7	4	1	0	0	1	6.76	1.22734
1	2	3	3	3	2	3	2	2	2	3	2	7	7	4	3	0	1	0	6.76	1.22734
1	2	2	3	2	1	1	2	2	1	3	2	1	7	2	3	0	0	0	6.76	1.22734
